# Supplementary material
Source: PubMed Central journal article supplement (PMC7113119)
Supplement: NIHMS1059456-supplement-Supp_FigS1-15.pdf [file NIHMS1059456-supplement-Supp_FigS1-15.pdf]

**A**

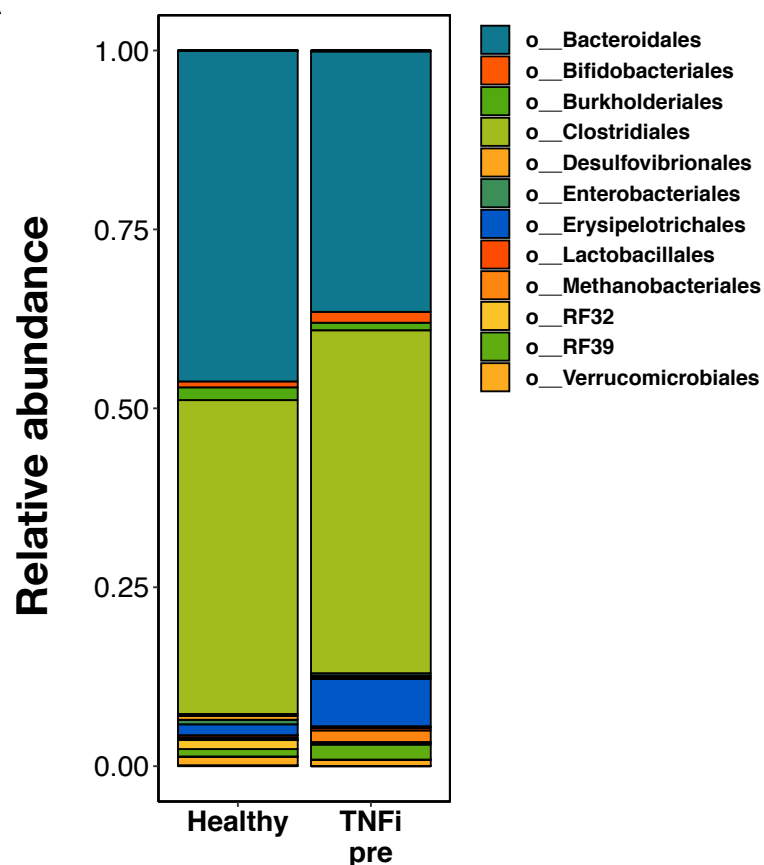

**B**

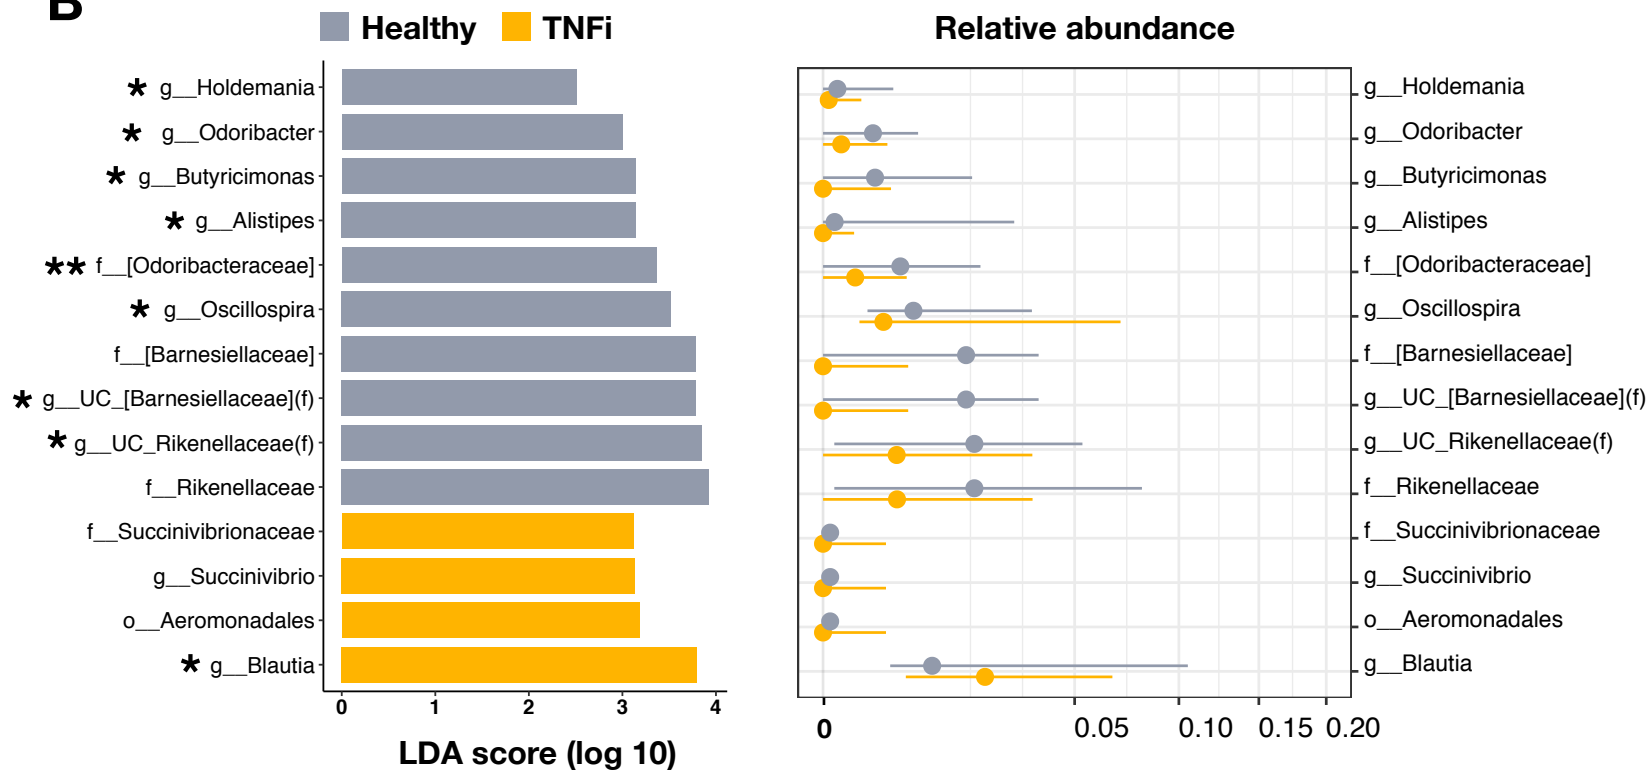

**A**

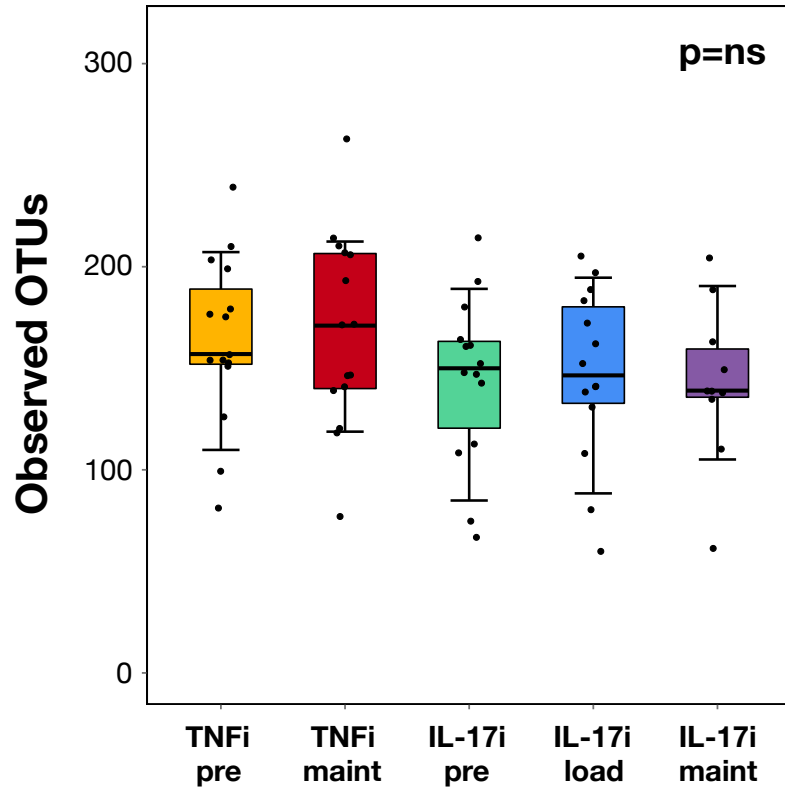

**B**

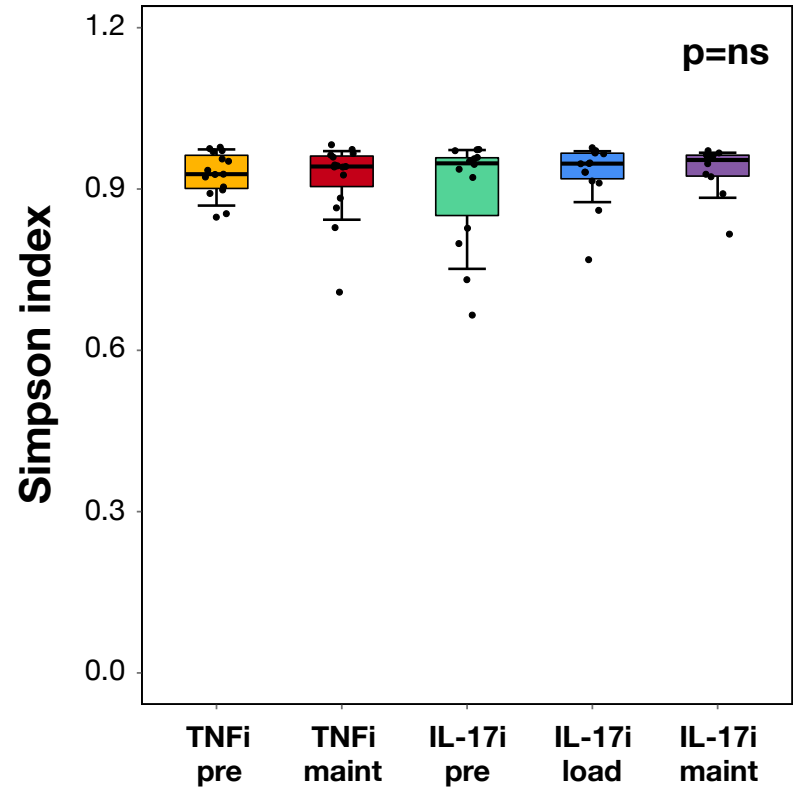



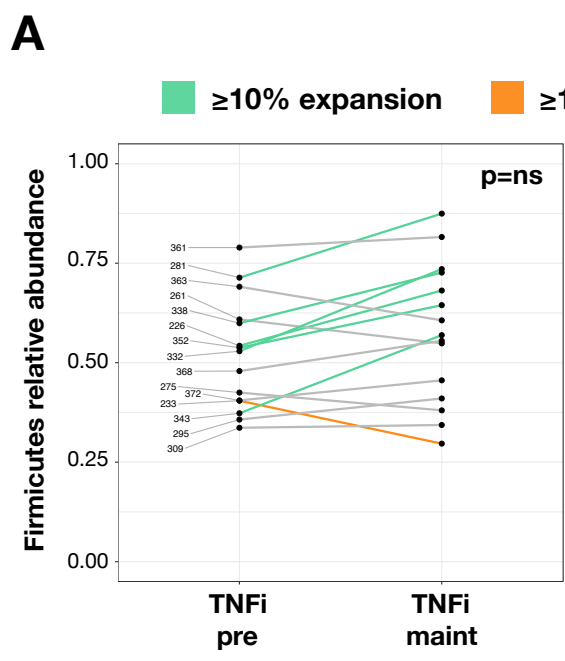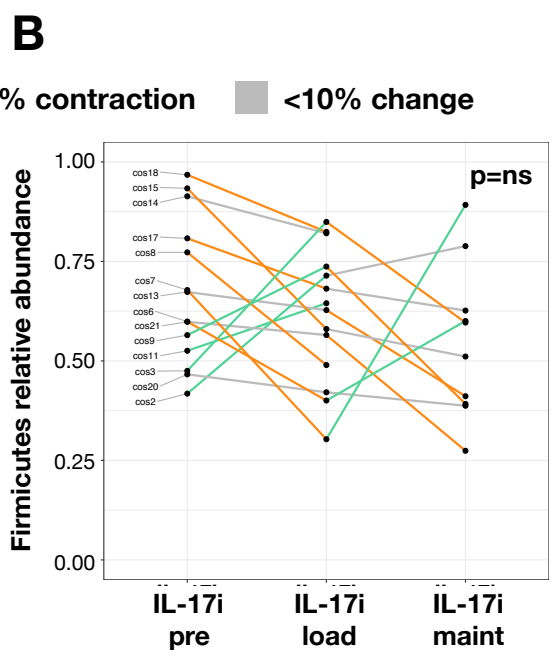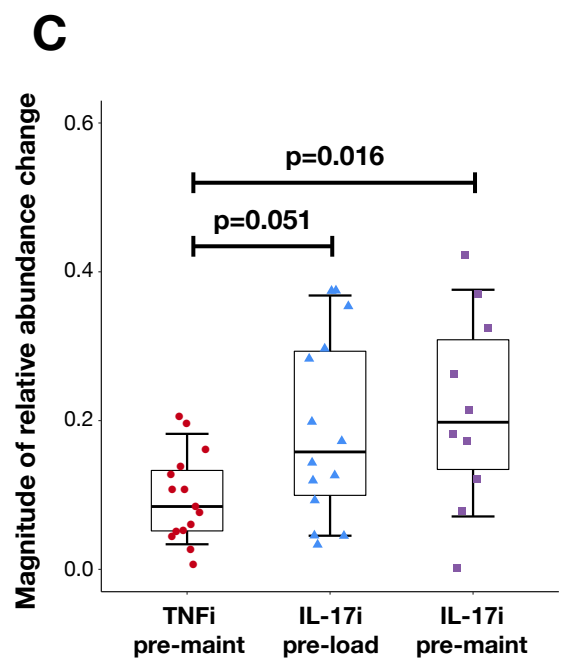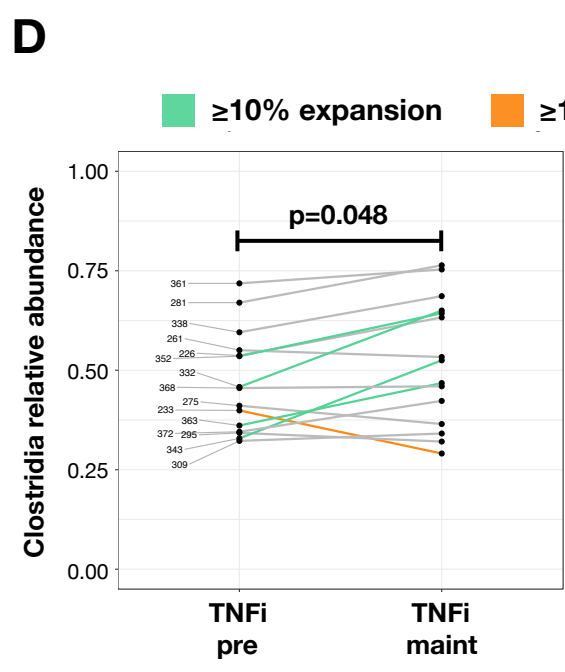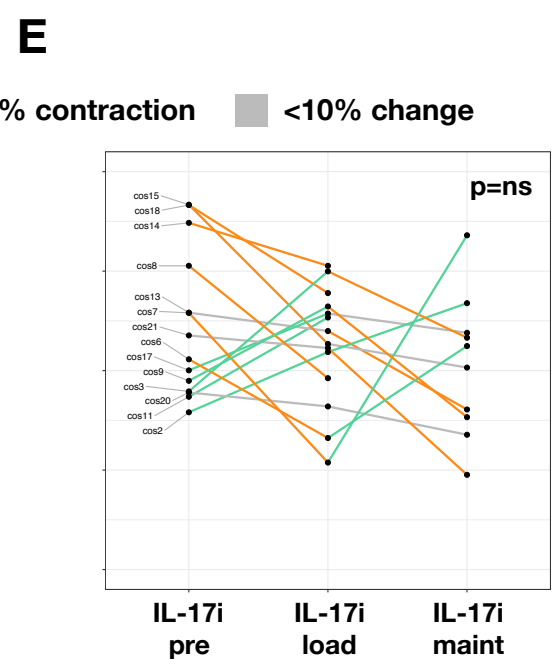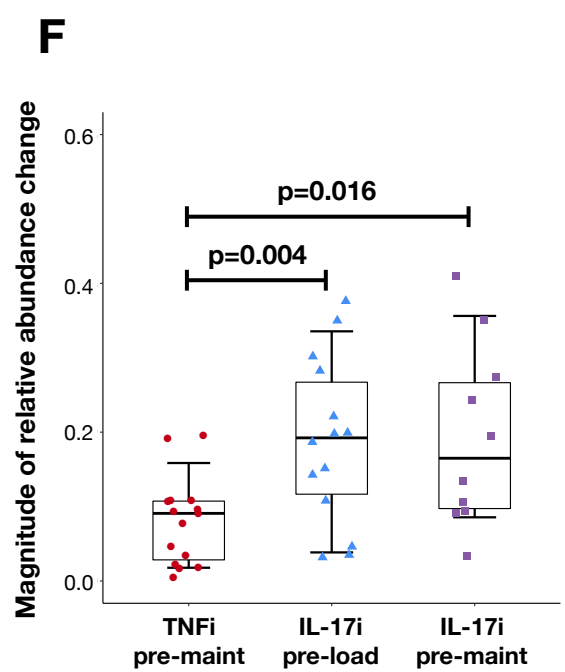

**Clostridia (c)**

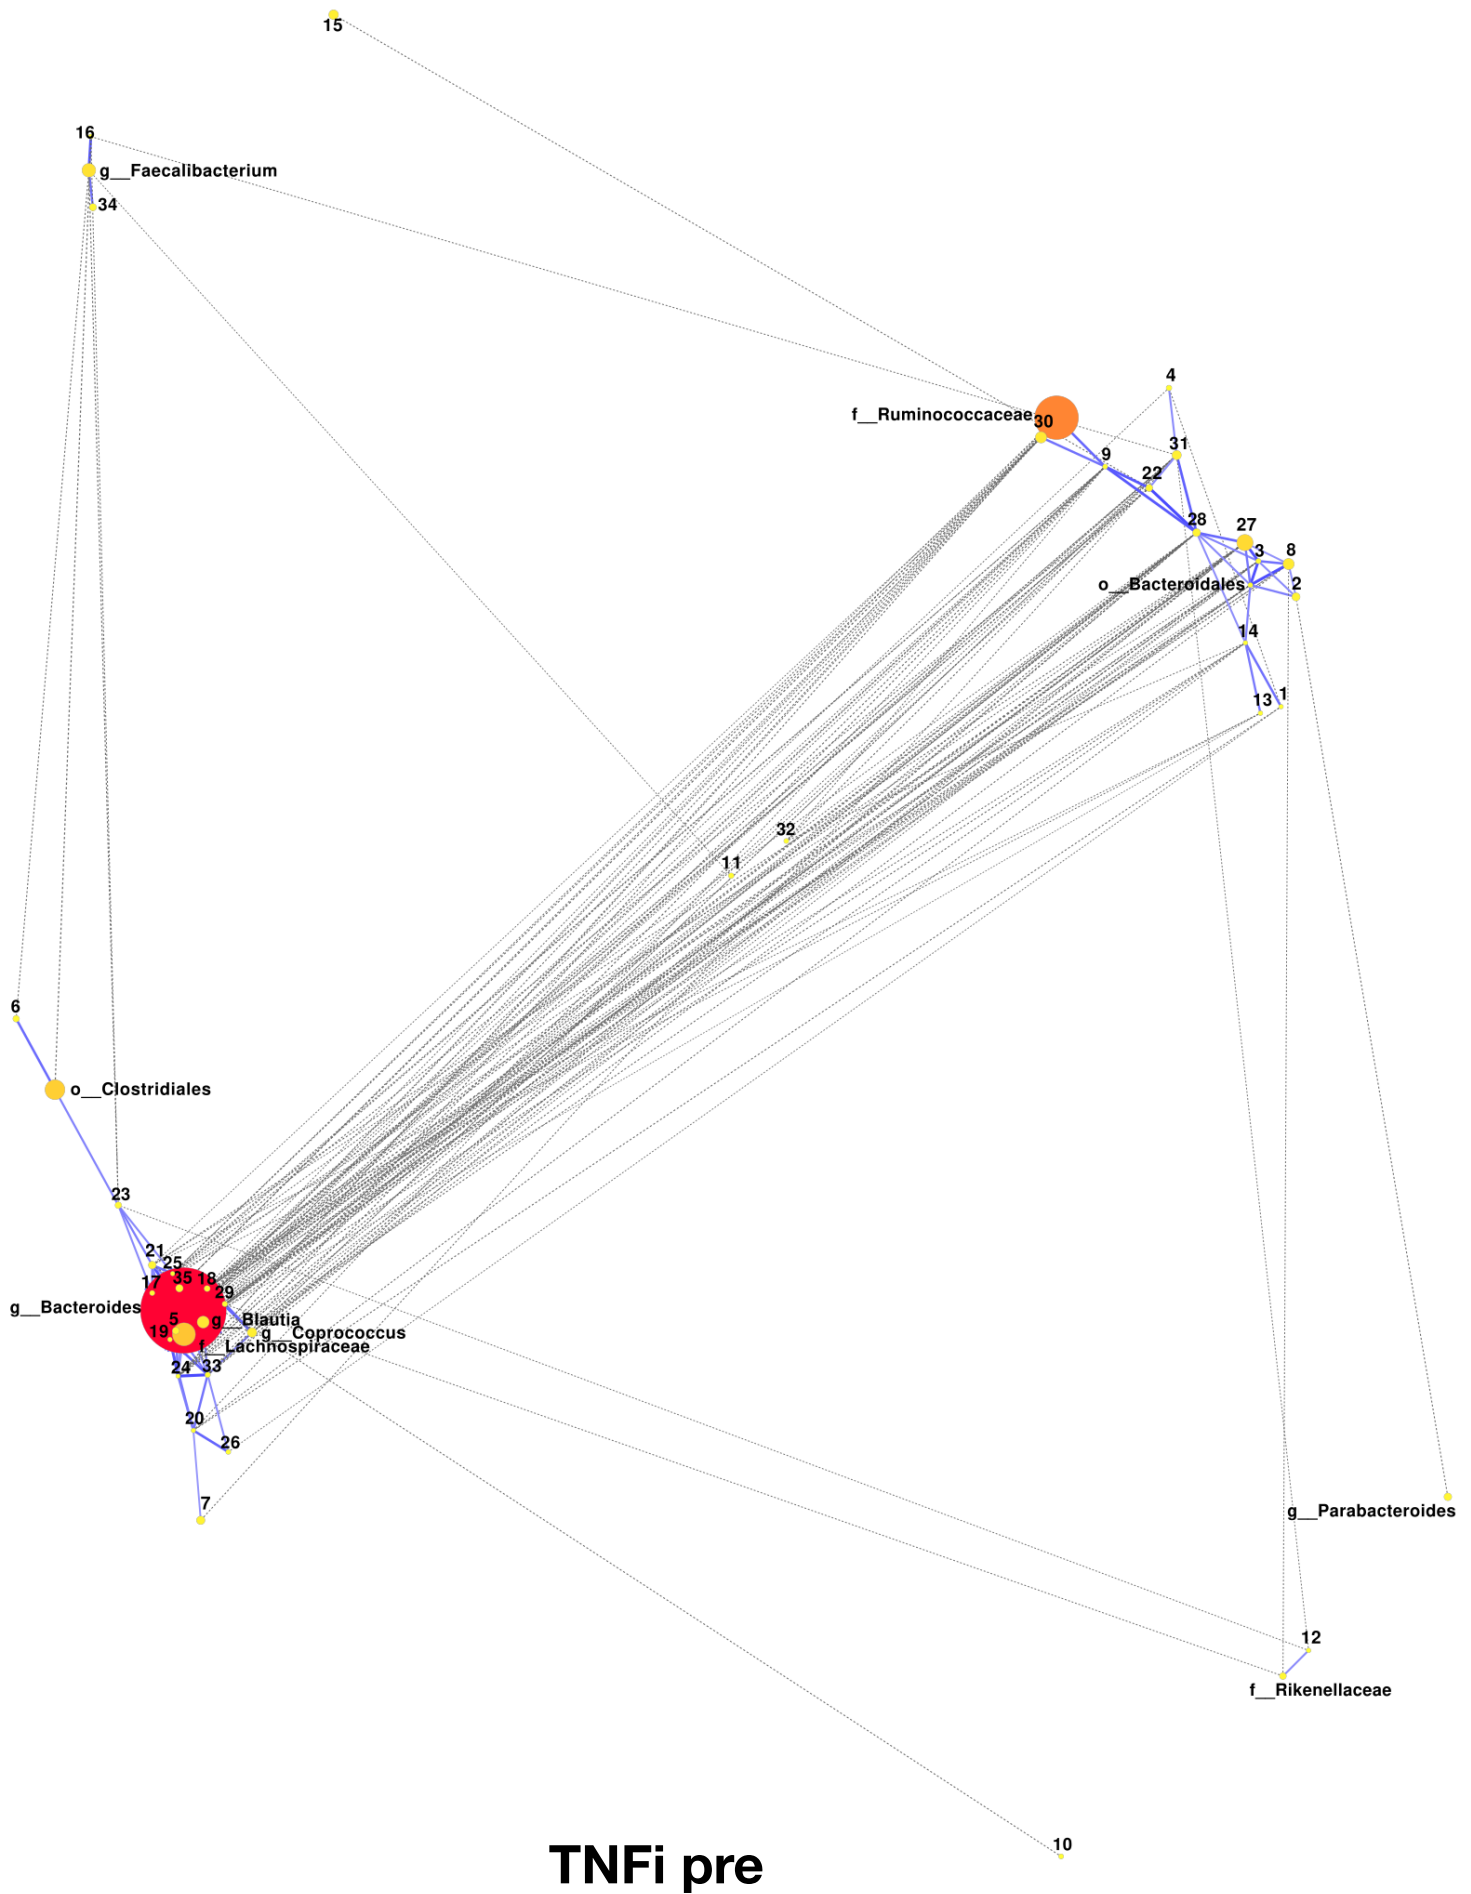

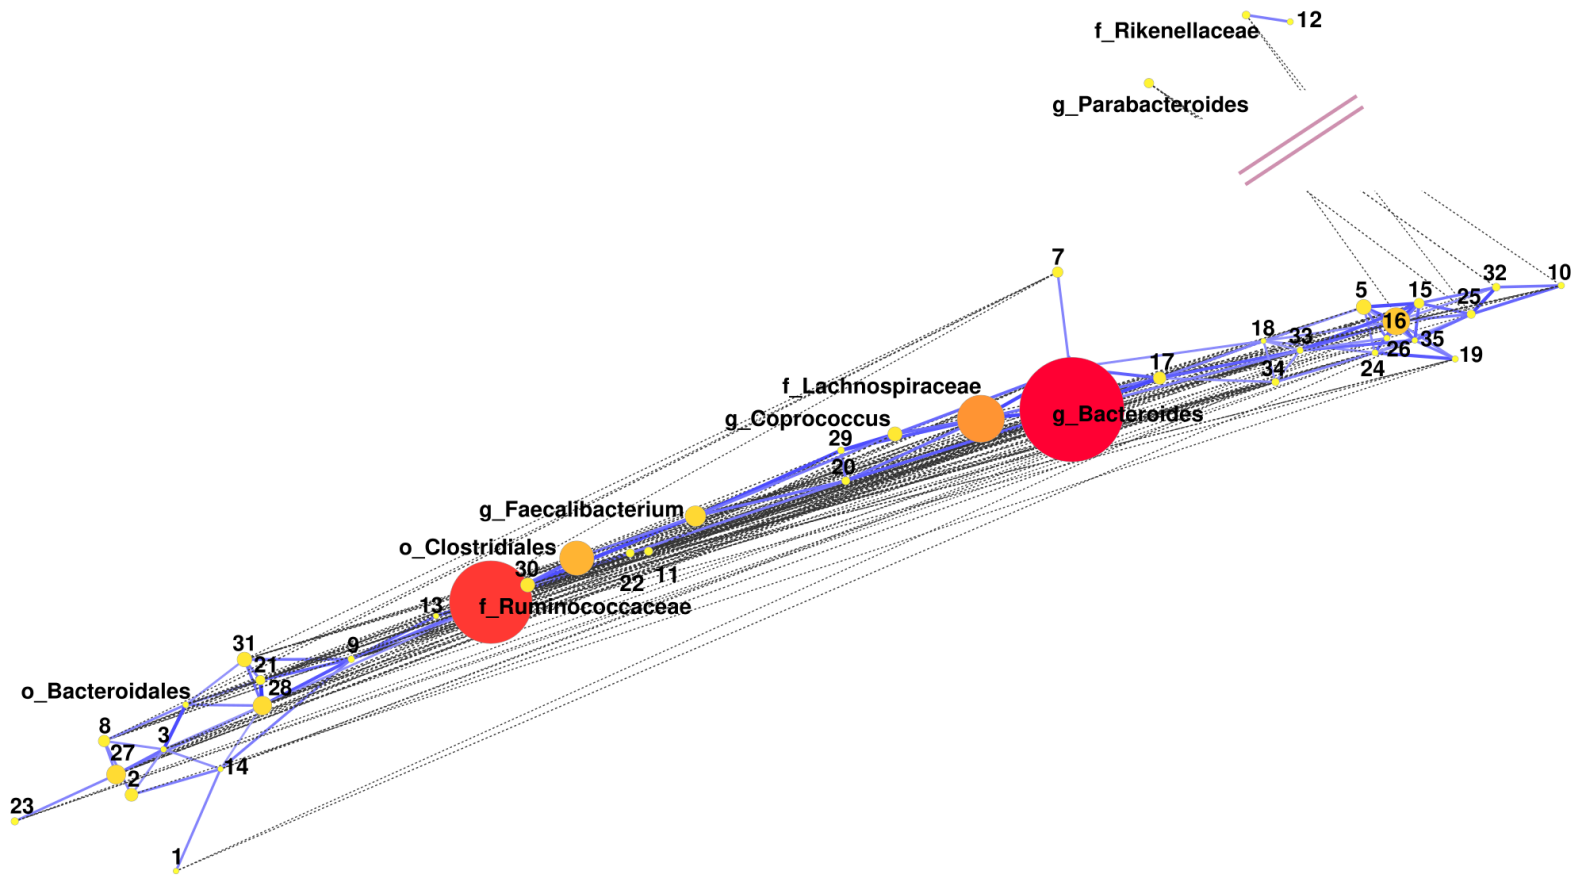

**TNFi maintenance**

**A**

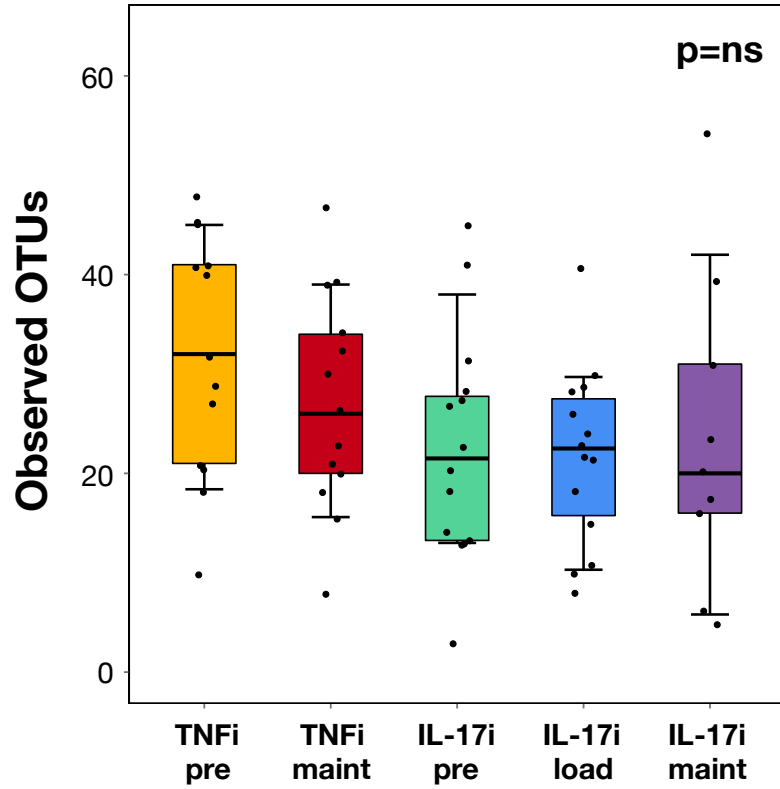

**B**

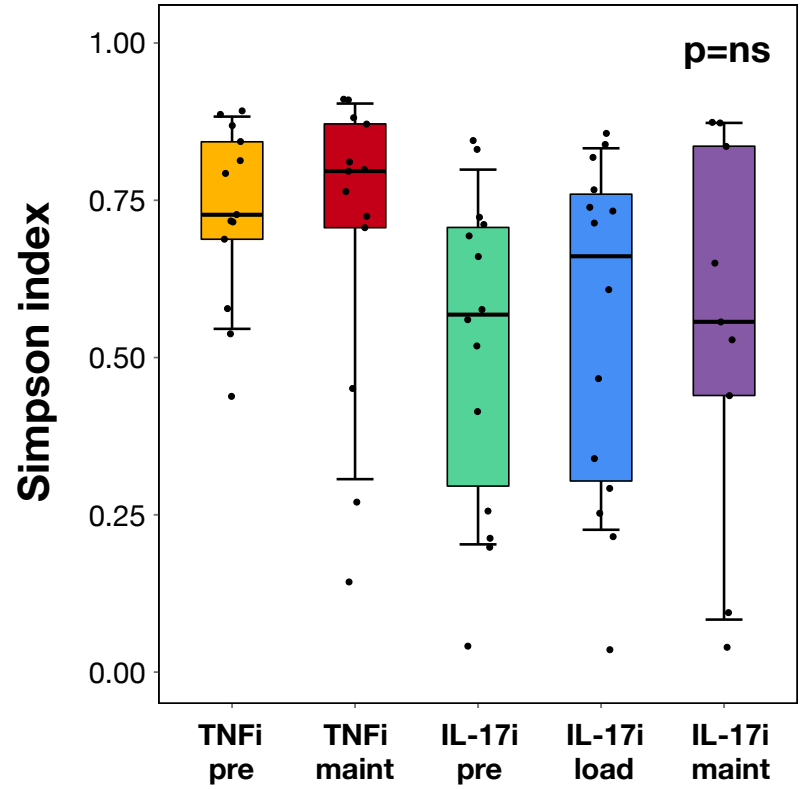

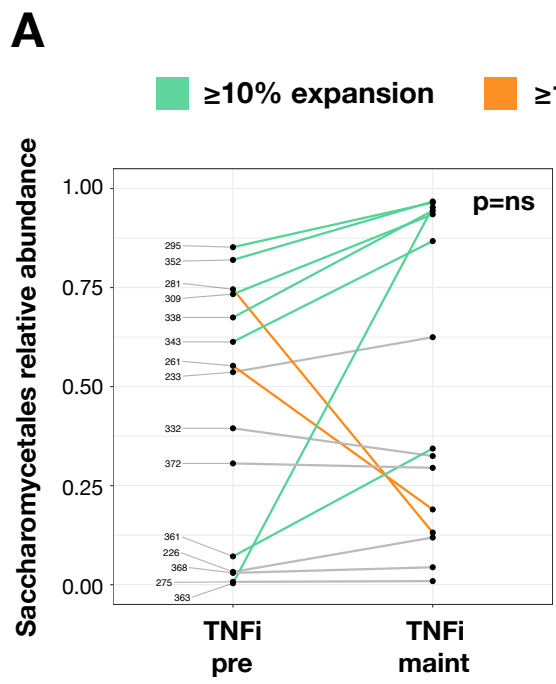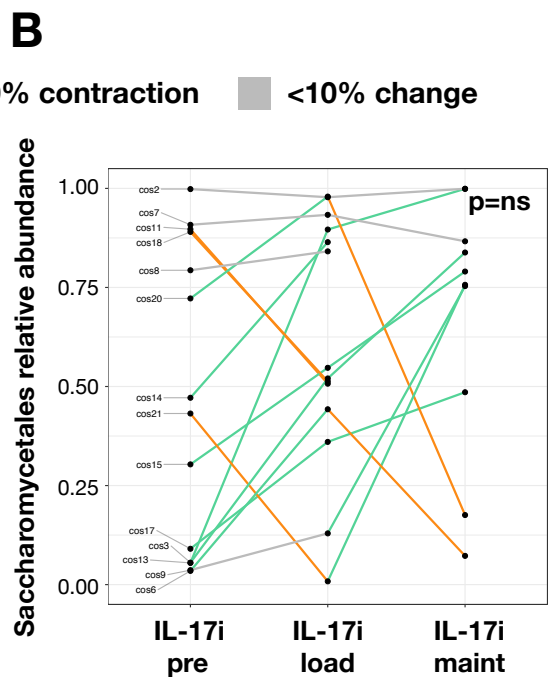

Saccharomyces (o)

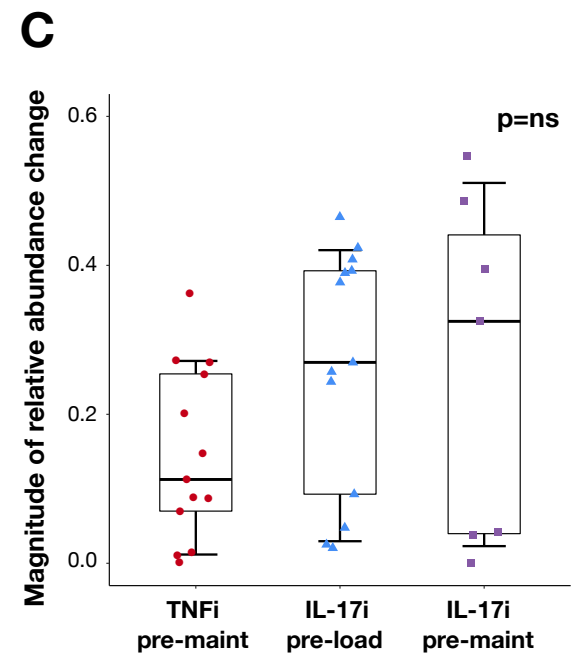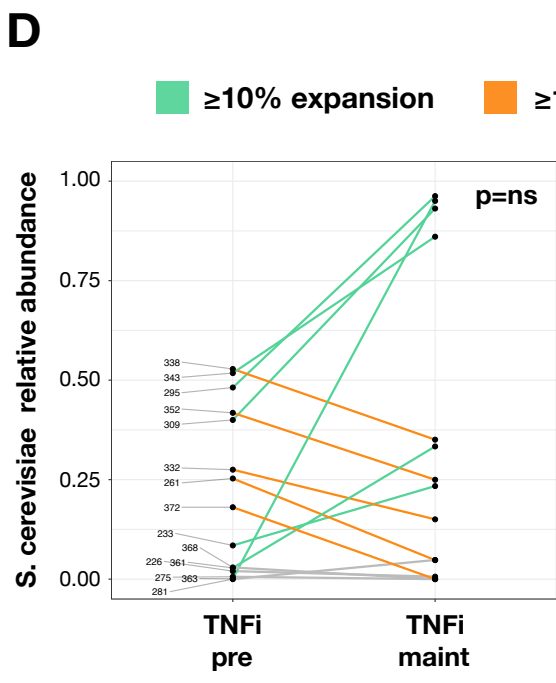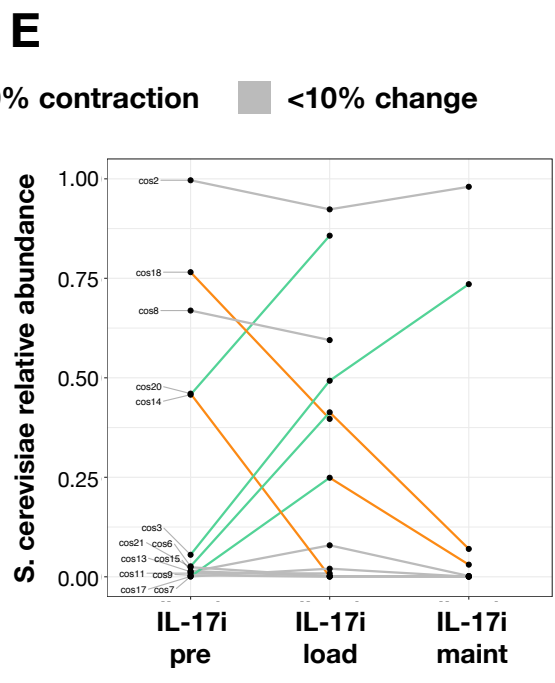

*Saccharomyces cerevisiae* (s)

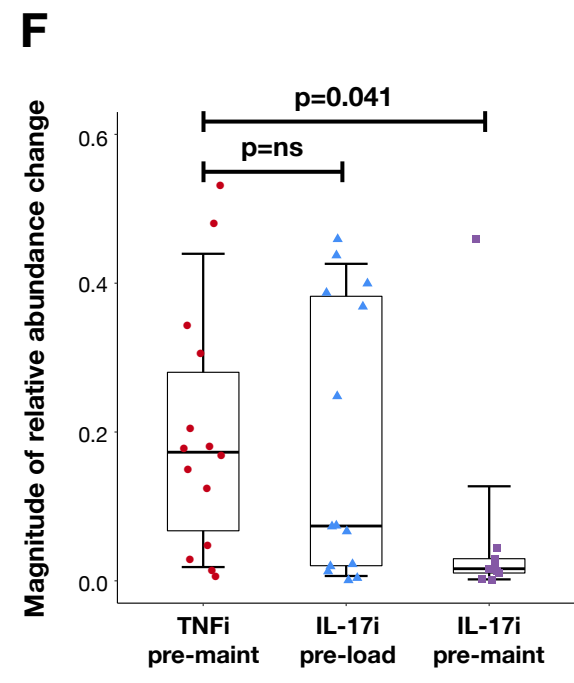

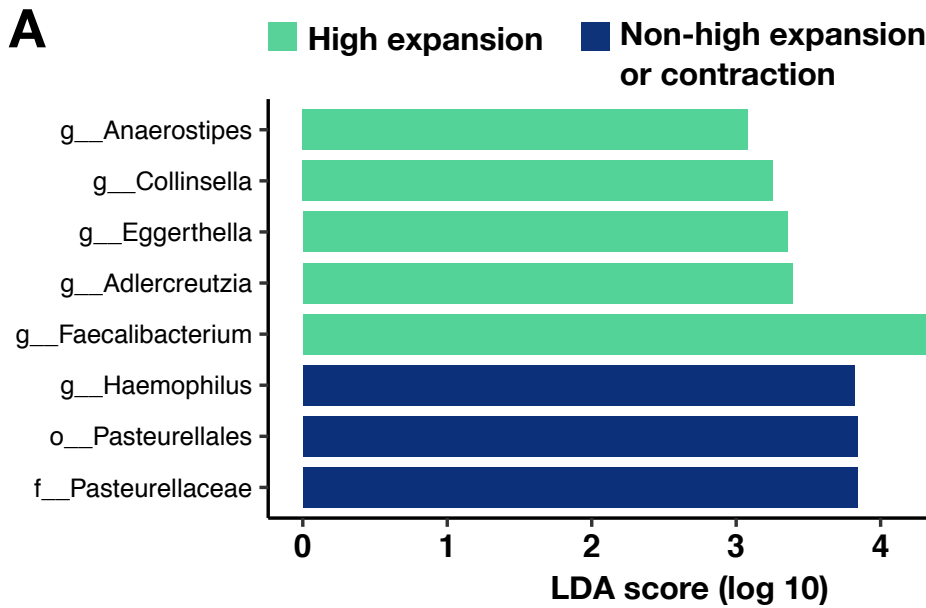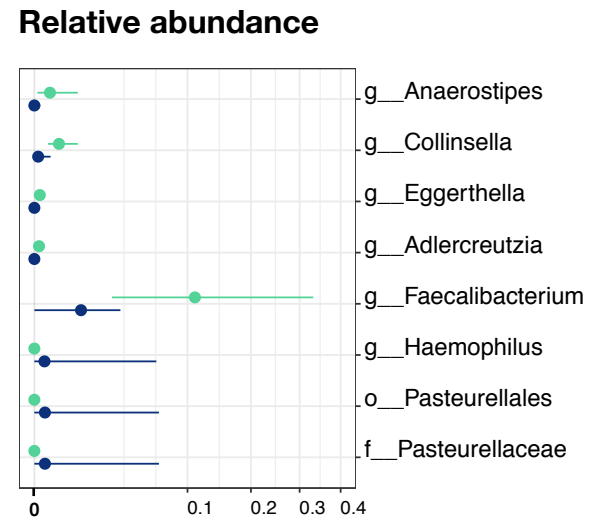

**Candida IL-17i pre**

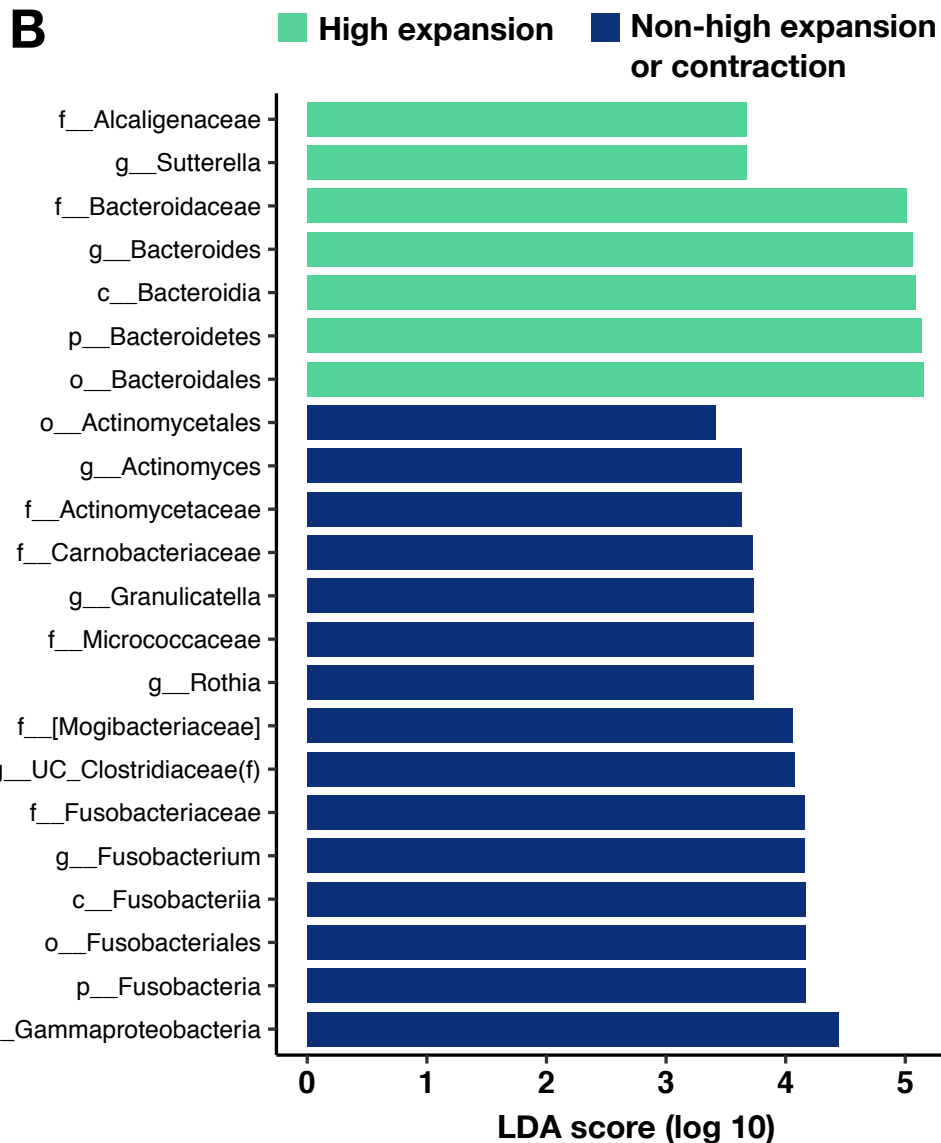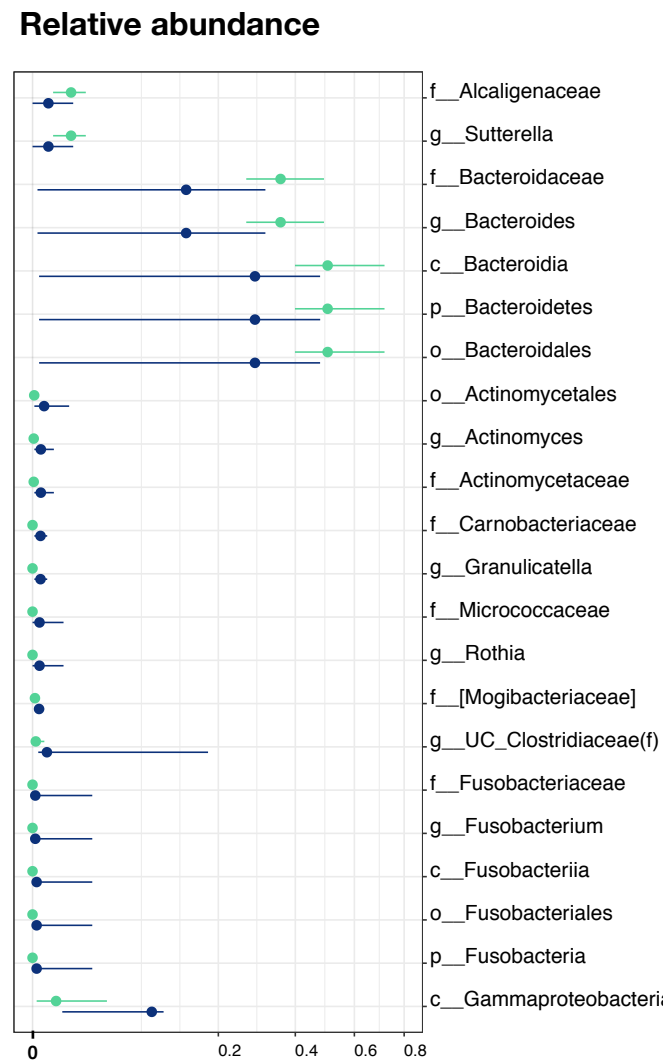

**Candida IL-17i maintenance**

**A**

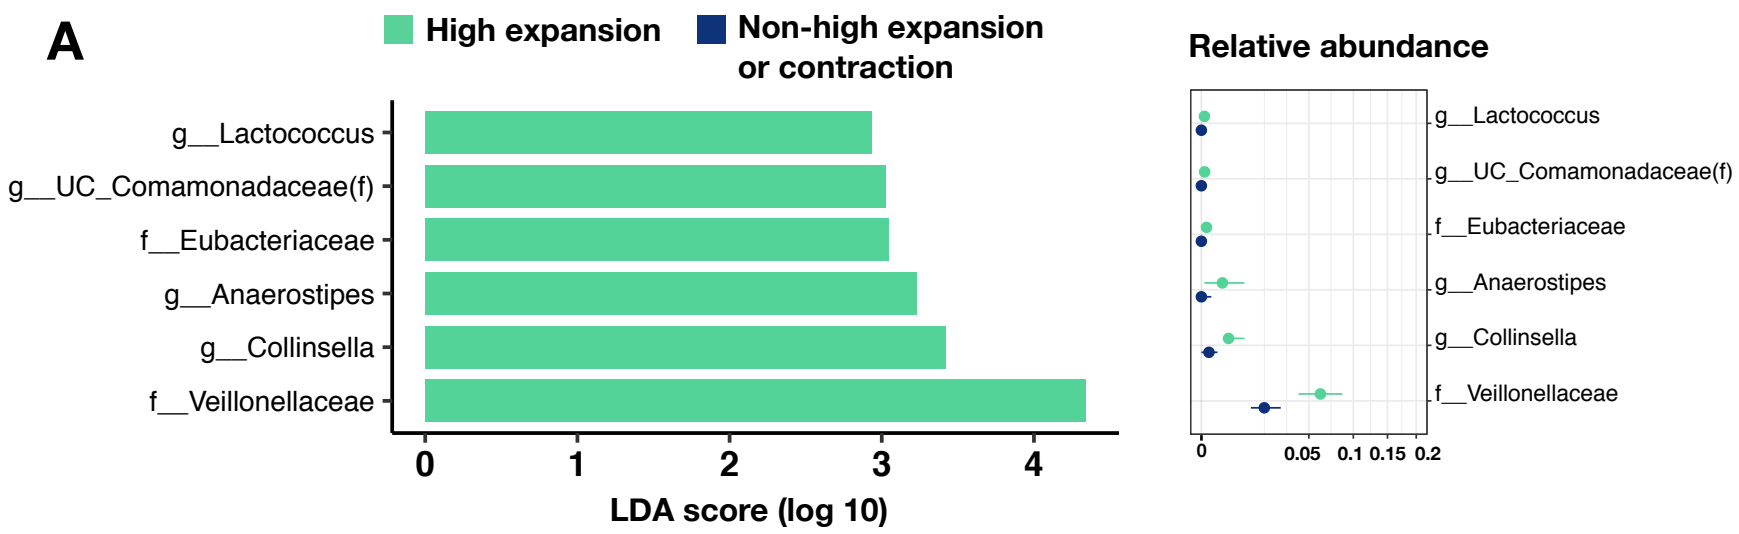

**C. albicans IL-17i pre**

**B**

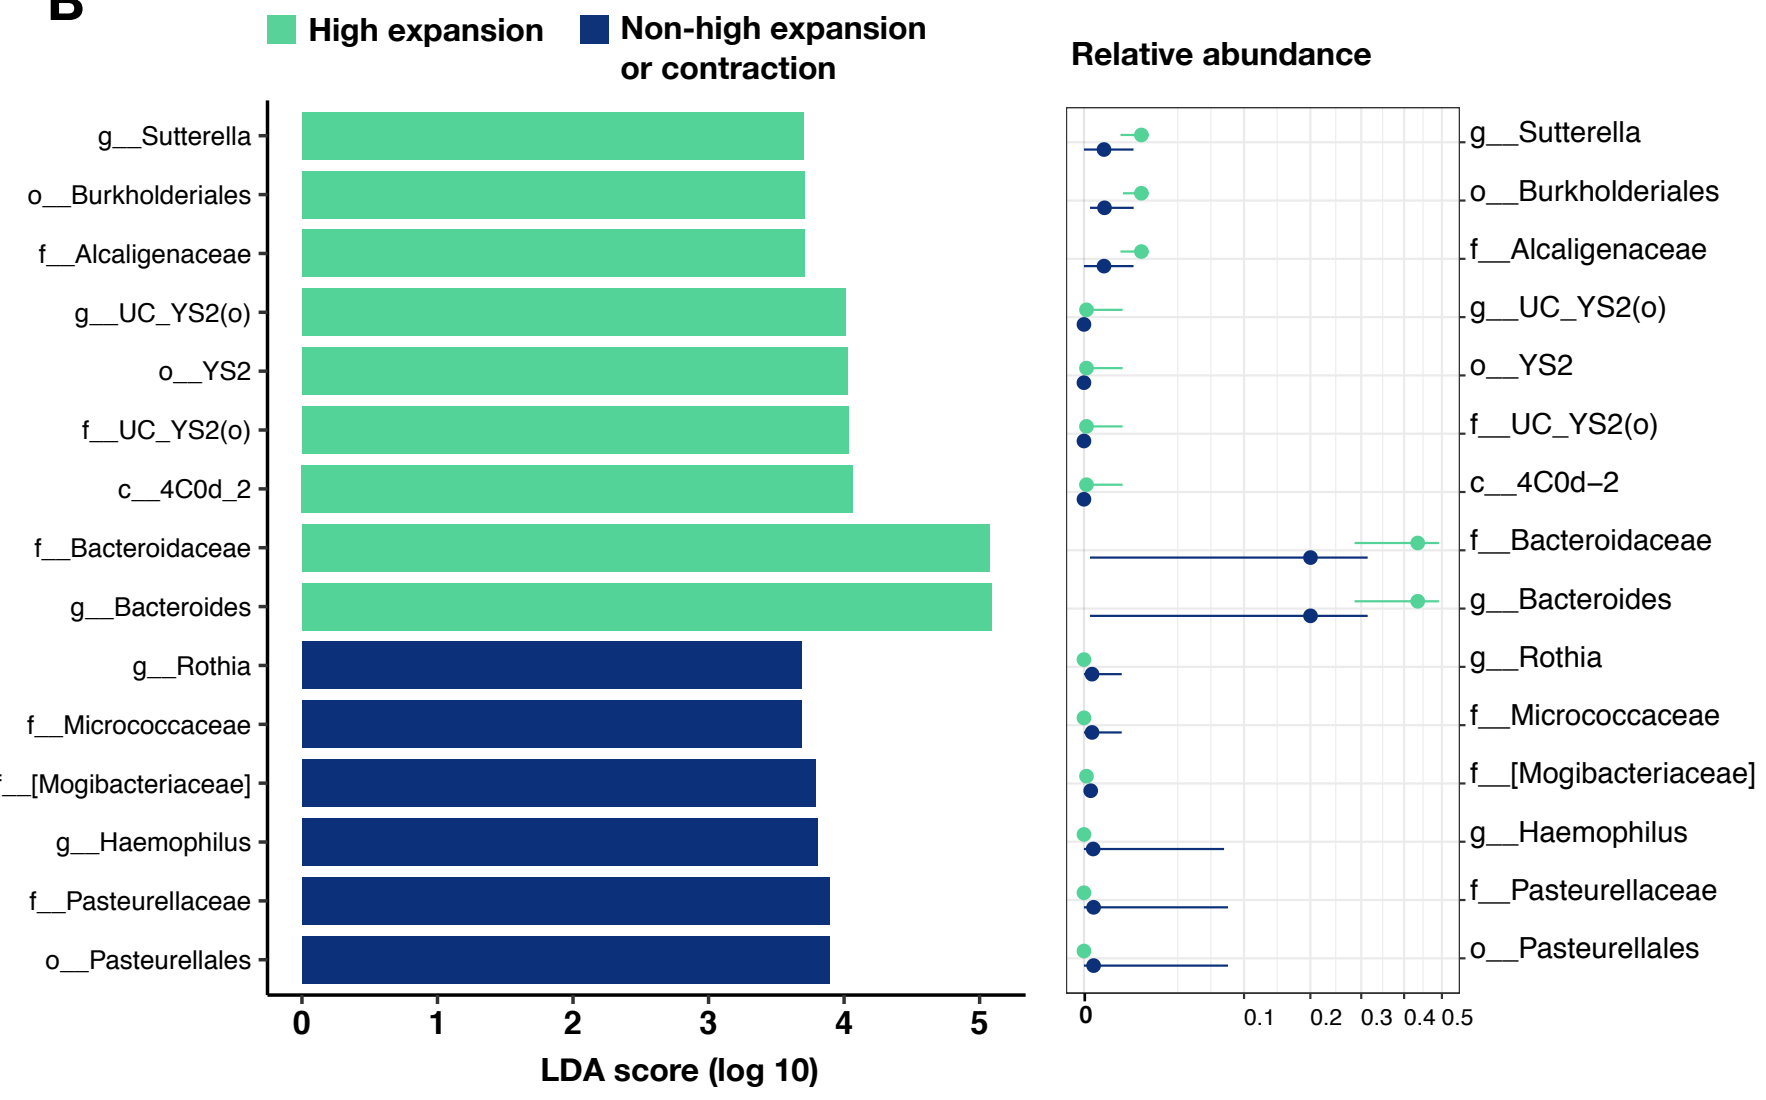

**C. albicans IL-17i maintenance**

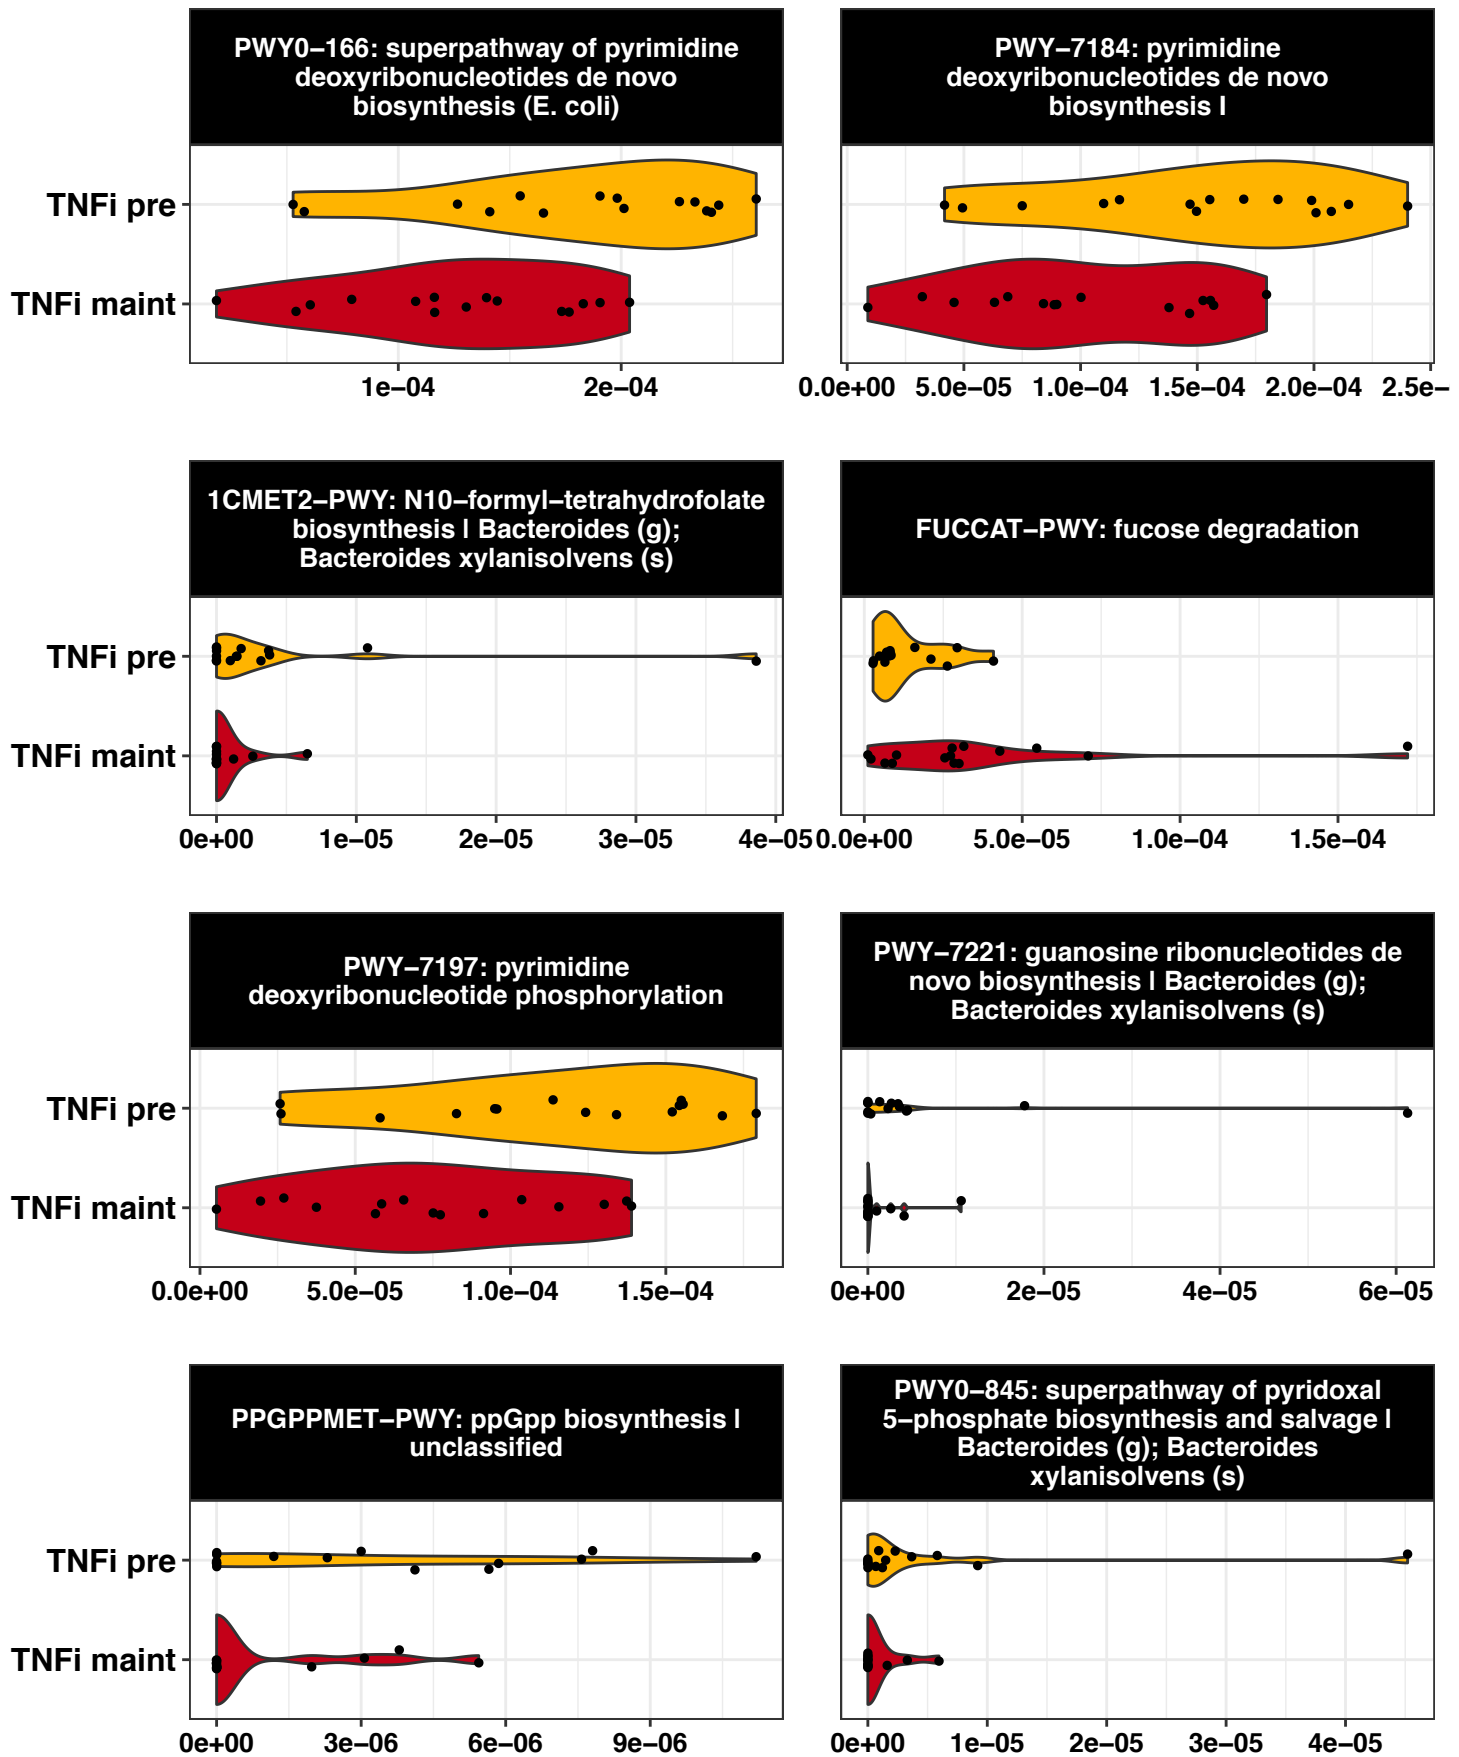



**:: Supplementary Figure 10 ::**

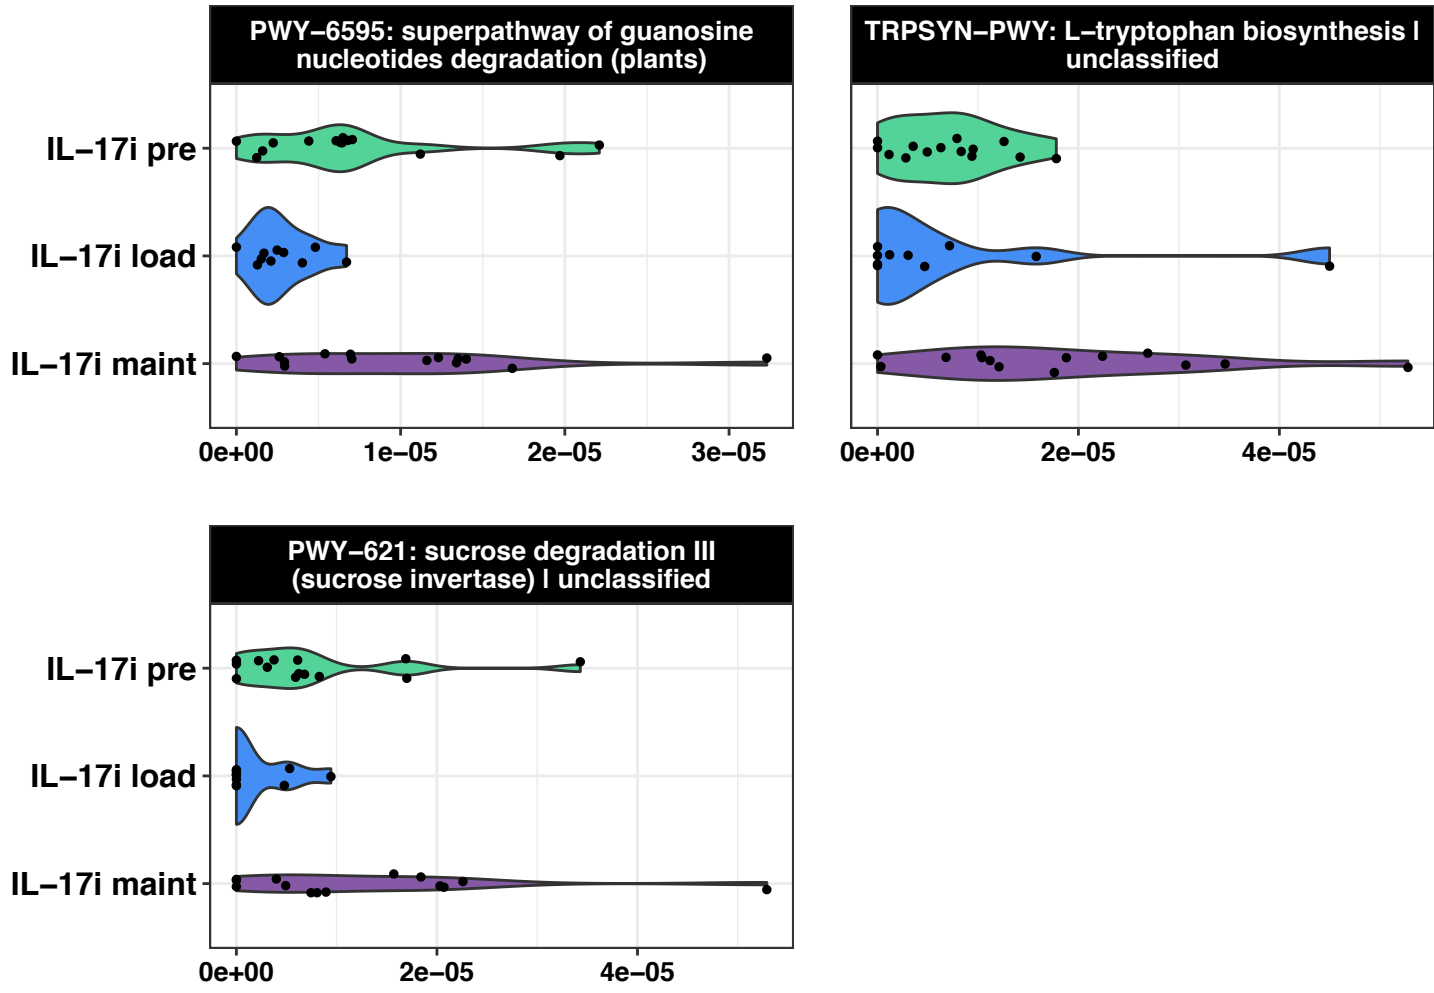

**Pathway relative abundance**





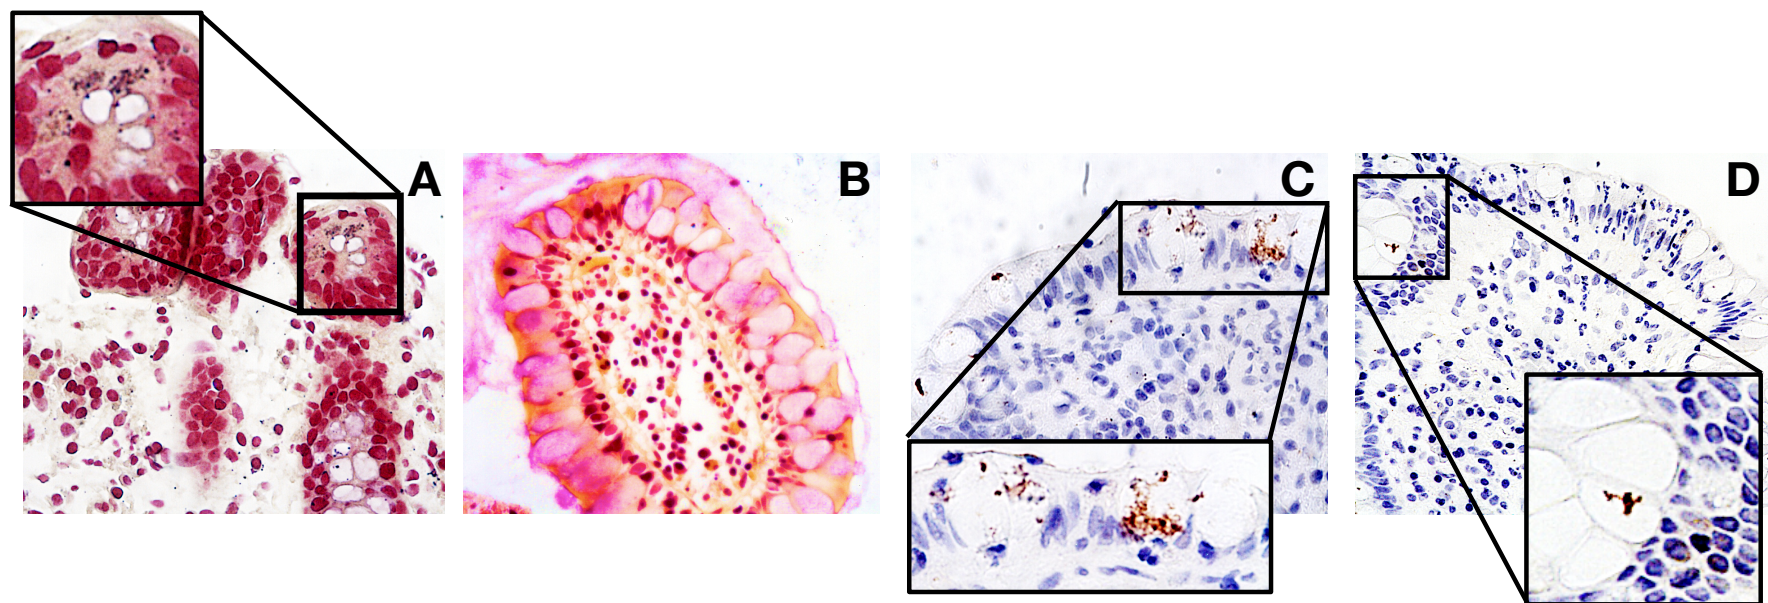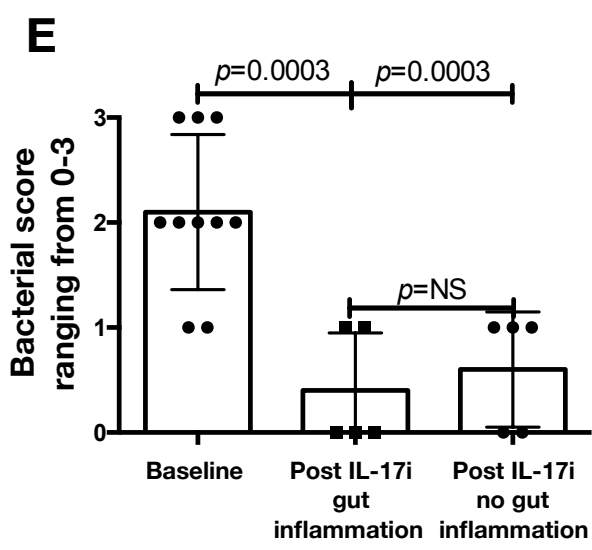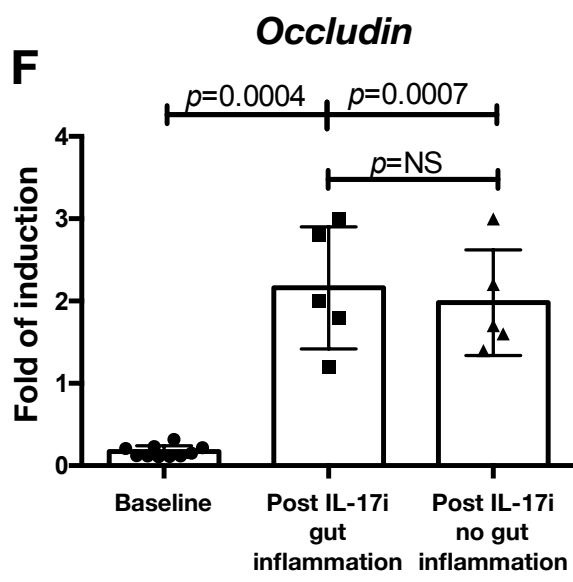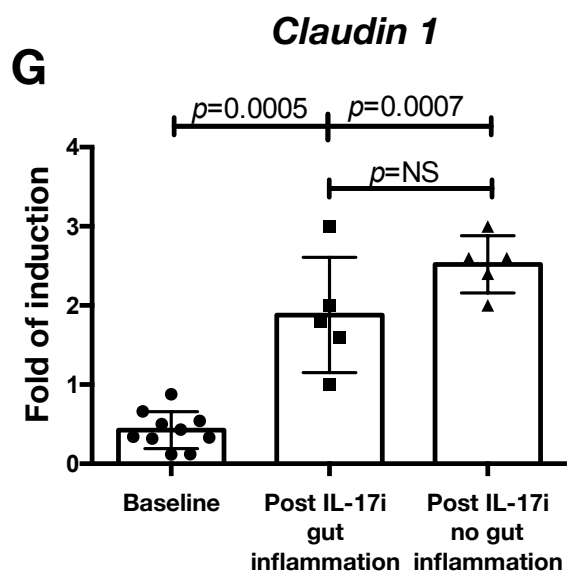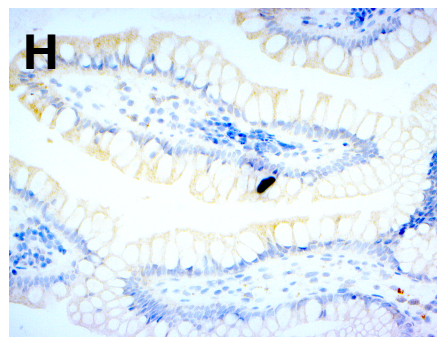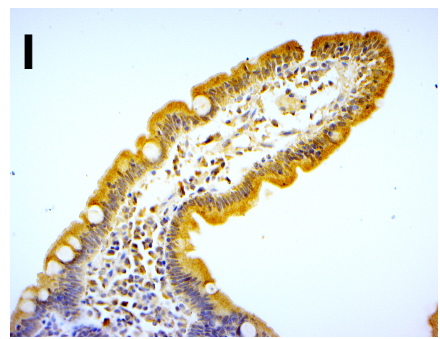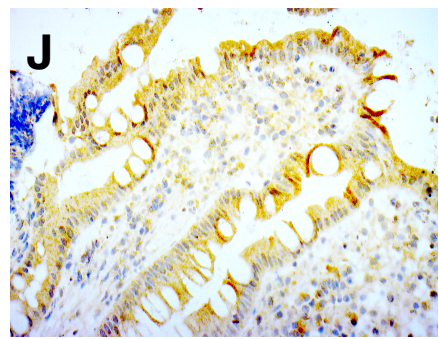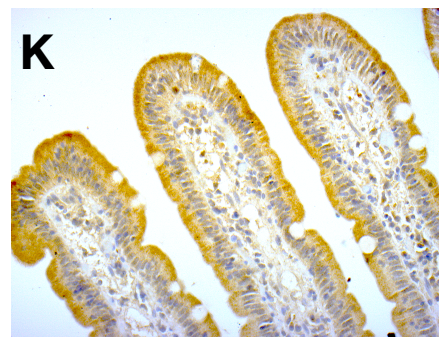

Pre IL-17i

Post IL-17i

Pre IL-17i

Post IL-17i

*Occludin*

*Claudin 1*

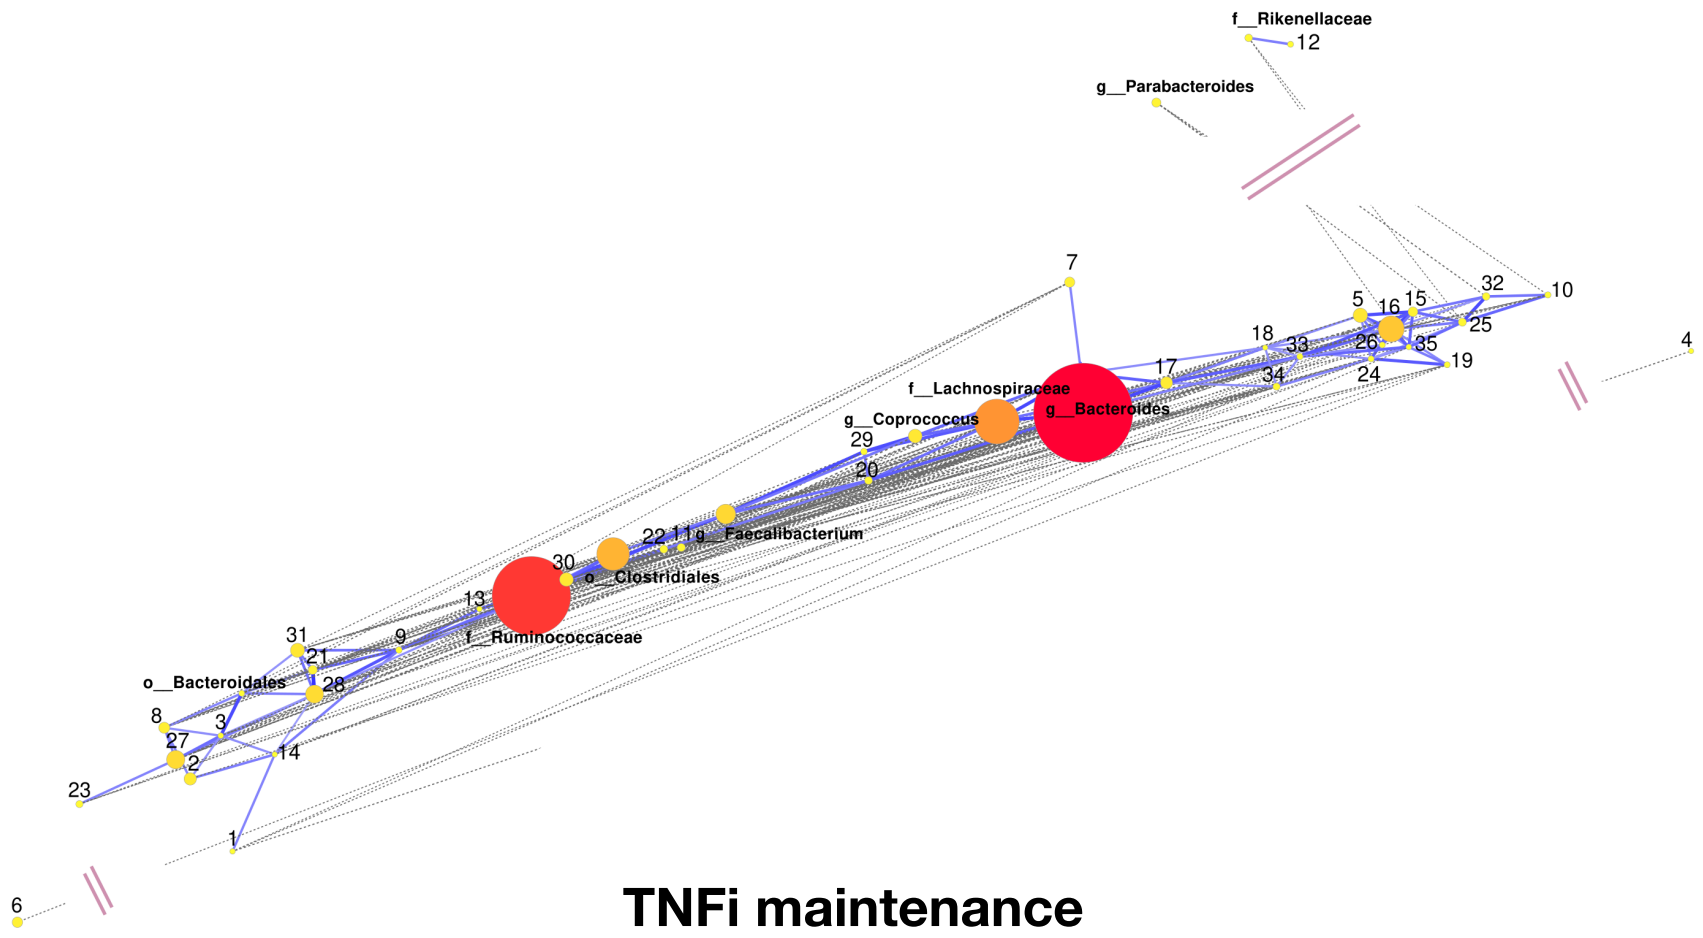



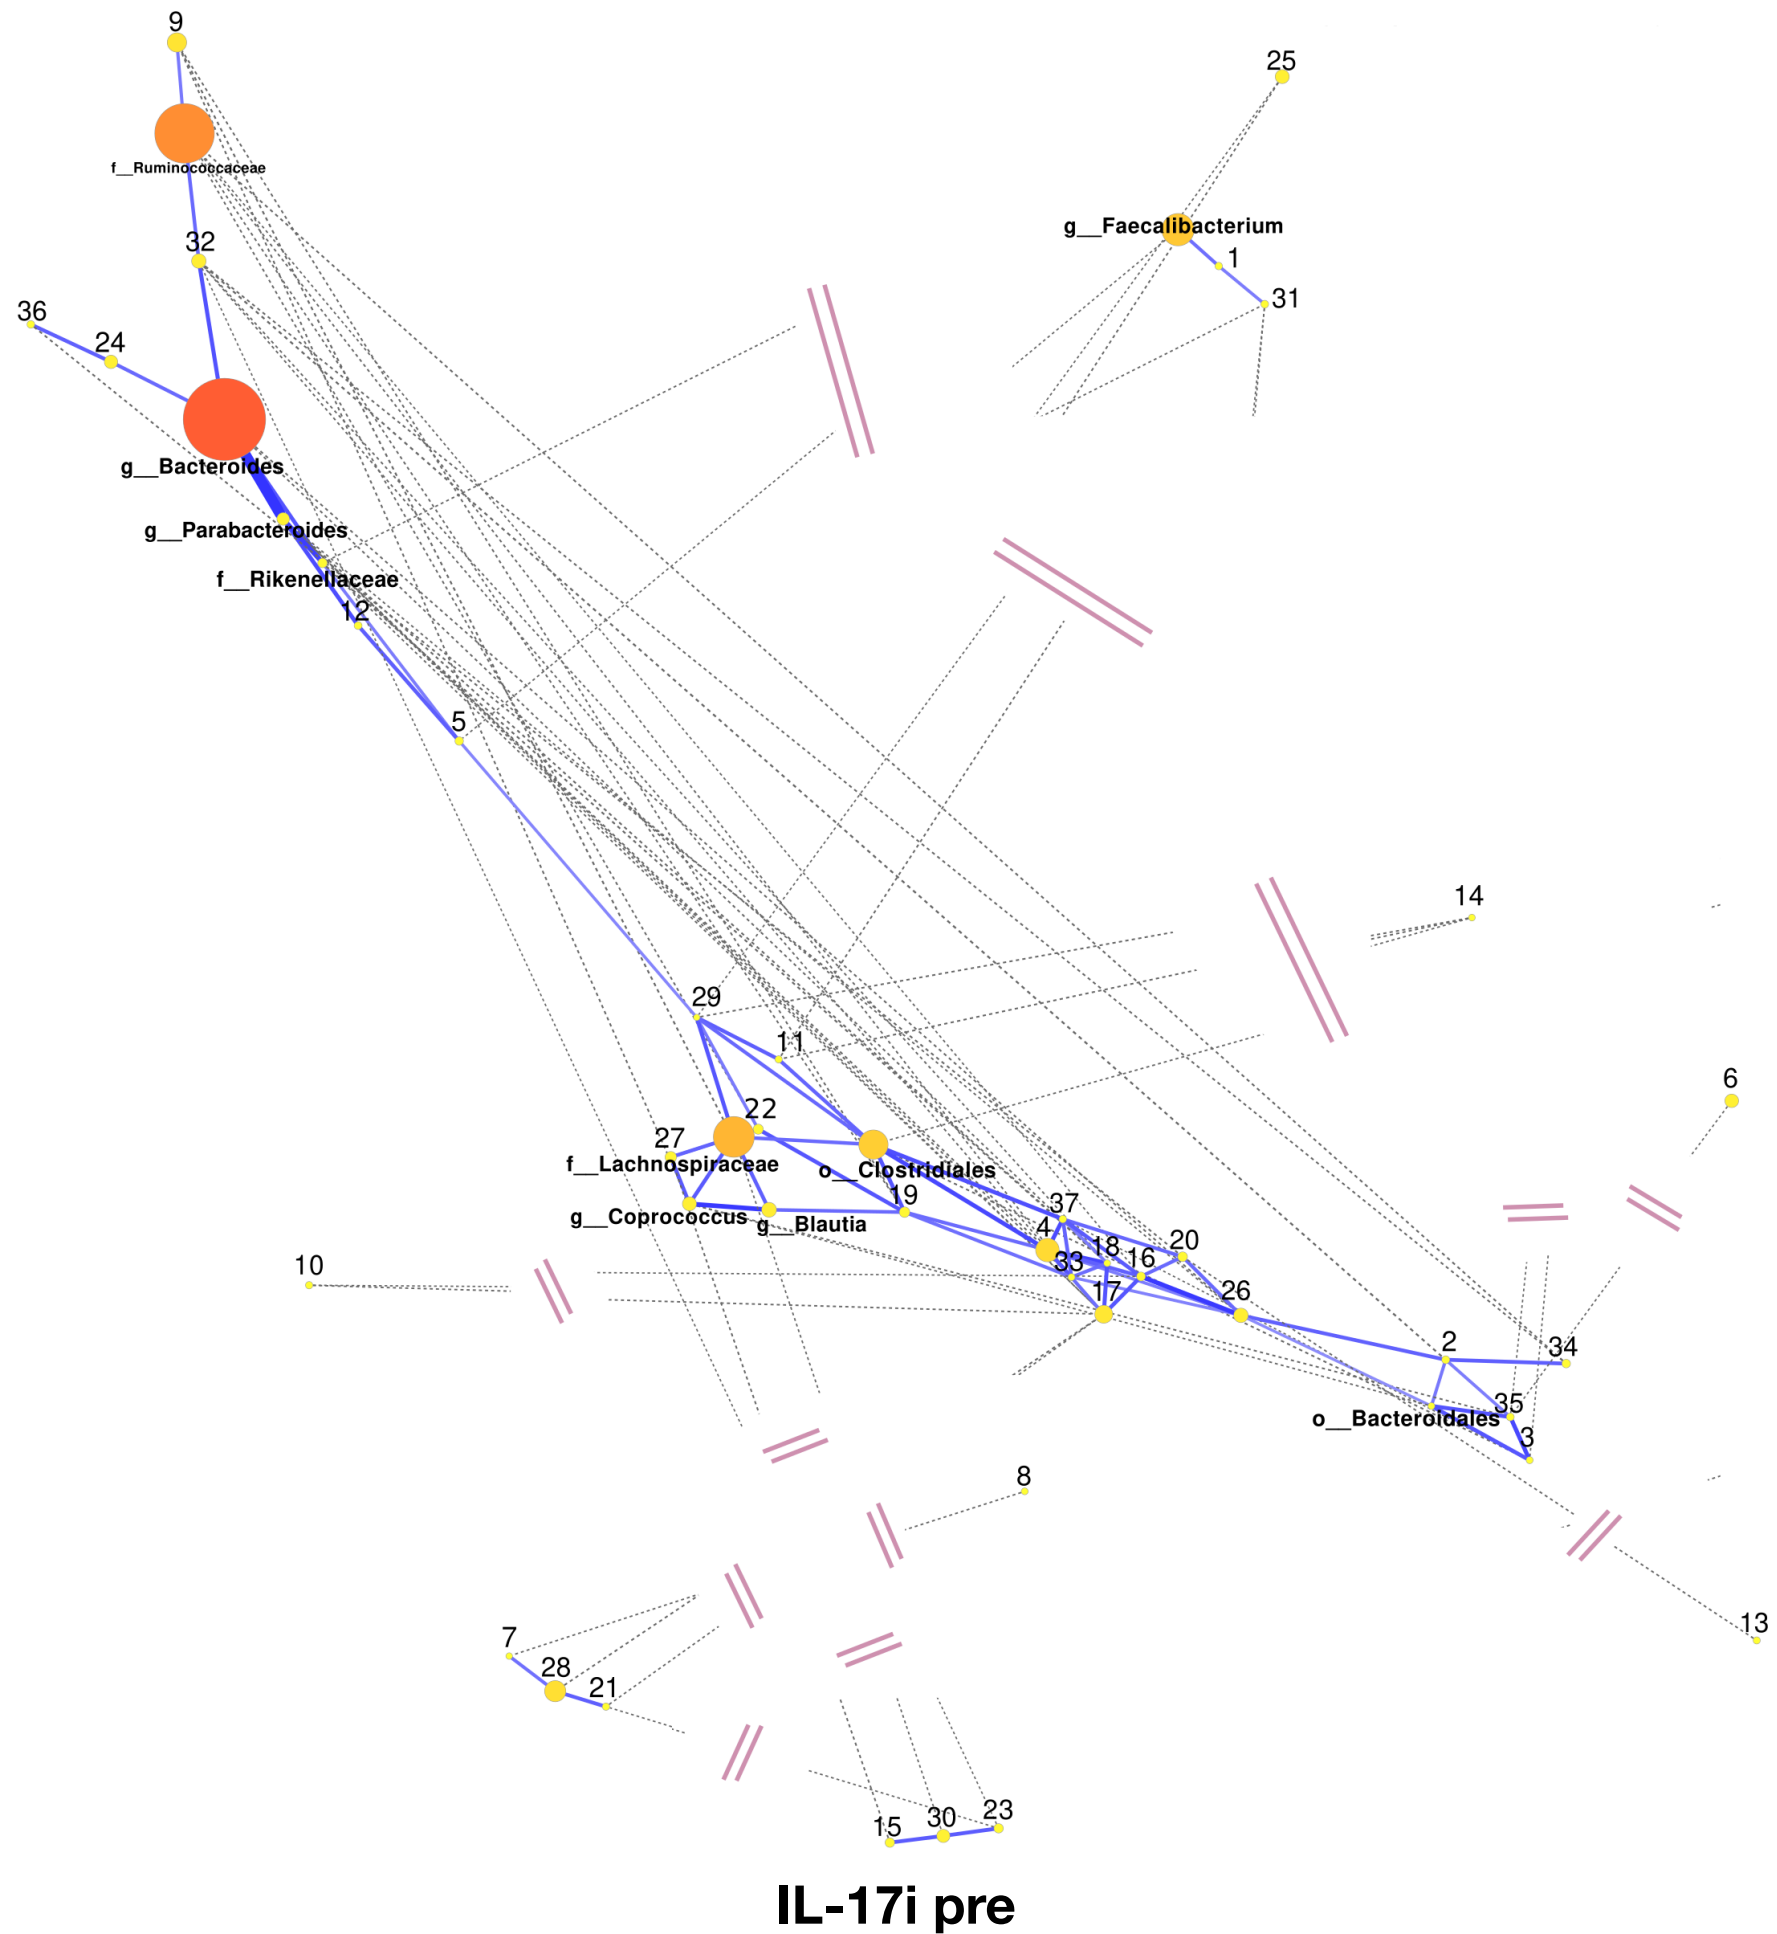

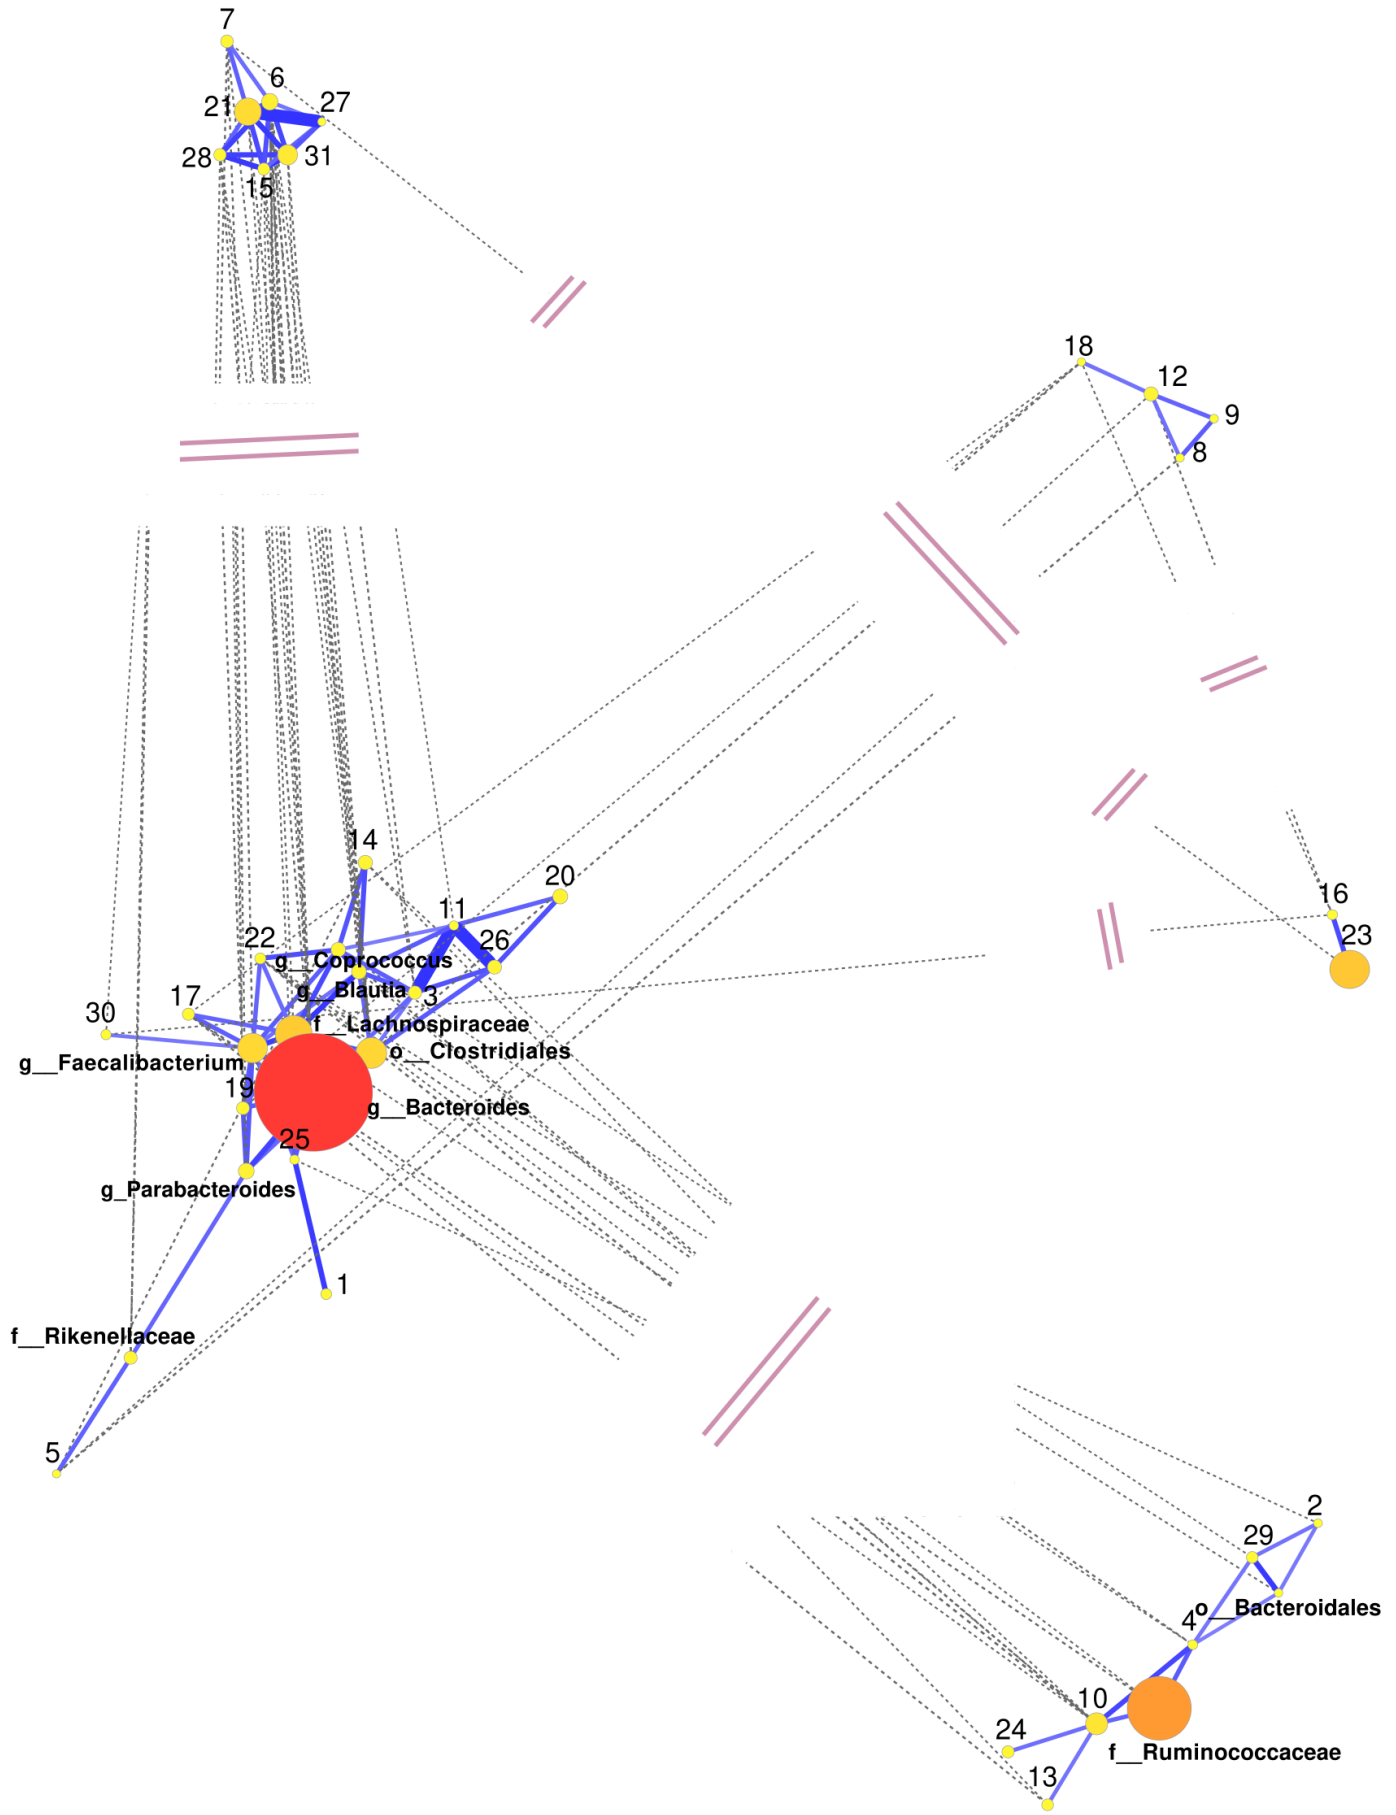

IL-17i maintenance
