# Supplementary material
Source: PubMed Central journal article supplement (PMC7113119)
Supplement: NIHMS1059456-supplement-Supp_TableS1-8.pdf [file NIHMS1059456-supplement-Supp_TableS1-8.pdf]

|                                                               | <b>TNFi<br/>(n=15)</b> | <b>IL-17i<br/>(n=14)</b> | <b>p-value</b> |
|---------------------------------------------------------------|------------------------|--------------------------|----------------|
| <b>Age in years, mean ± SD (range)</b>                        | 38.9 ± 9.5 (22-53)     | 47.6 ± 16.2 (22-78)      | 0.084          |
| <b>Female, n (%)</b>                                          | 4 (26.7)               | 9 (64.3)                 | 0.066          |
| <b>Race/Ethnicity, n (%)</b>                                  |                        |                          | 0.651          |
| <b>Caucasian Non-Hispanic</b>                                 | 11 (73.3)              | 12 (85.7)                |                |
| <b>Caucasian Hispanic</b>                                     | 4 (26.7)               | 2 (14.3)                 |                |
| <b>Body mass index in kg/m<sup>2</sup>, mean ± SD (range)</b> | 26.8 (6.0)             | 27.6 (6.1)               | 0.722          |
| <b>HLA-B27 positive, n (%)</b>                                | 2 (13.3)               | 1 (7.14)*                | 0.512          |
| <b>Disease Phenotype, n (%)</b>                               |                        |                          |                |
| <b>Peripheral PsA</b>                                         | 8 (53.3)               | 5 (35.7)                 | 0.462          |
| <b>Axial PsA</b>                                              | 0 (0)                  | 1 (7.1)                  | 0.483          |
| <b>Peripheral/axial PsA</b>                                   | 7 (46.7)               | 4 (28.6)                 | 0.450          |
| <b>Axial SpA</b>                                              | 0 (0)                  | 3 (21.4)                 | 0.100          |
| <b>Psoriasis</b>                                              | 15 (100)               | 9 (64.3)                 | <b>0.017</b>   |
| <b>Elevated CRP, n (%)</b>                                    |                        |                          |                |
| <b>Elevated above ULN</b>                                     | 5 (33.3)               | 4 (28.6)                 | 0.316          |
| <b>Elevated 2x above ULN</b>                                  | 3 (20.0)               | 1 (7.1)                  | 0.222          |
| <b>Psoriasis severity, mean ± SD %<sup>#</sup></b>            | 2.1 ± 2.3              | N/A                      | N/A            |
| <b>&lt;3% BSA, n (%)</b>                                      | 12 (80.0%)             |                          |                |
| <b>3-10% BSA, n (%)</b>                                       | 3 (20.0%)              |                          |                |
| <b>&gt;10% BSA, n (%)</b>                                     | 0 (0%)                 |                          |                |
| <b>Tender joint count, mean ± SD (range)<sup>#</sup></b>      | 5.5 ± 6.6 (0-22)       | N/A                      | N/A            |
| <b>Swollen joint count, mean ± SD (range)<sup>#</sup></b>     | 3.6 ± 2.9 (0-11)       | N/A                      | N/A            |

# :: Supplementary Table 2 ::

| Taxa                     | Taxonomic level | p-value relative abundance TNFi pre vs maintenance | p-value relative abundance IL-17i pre vs loading | p-value relative abundance IL-17i pre vs maintenance | p-value magnitude of relative abundance change TNFi pre-maintenance vs IL-17i pre-loading | p-value magnitude of relative abundance change TNFi pre-maintenance vs IL-17i pre-maintenance |
|--------------------------|-----------------|----------------------------------------------------|--------------------------------------------------|------------------------------------------------------|-------------------------------------------------------------------------------------------|-----------------------------------------------------------------------------------------------|
| p_Bacteroidetes          | Phylum          | 0.064                                              | 0.296                                            | 0.432                                                | 0.591                                                                                     | 1.000                                                                                         |
| <b>p_Firmicutes</b>      | <b>Phylum</b>   | 0.064                                              | 0.358                                            | 0.432                                                | 0.051                                                                                     | <b>0.016</b>                                                                                  |
| p_Proteobacteria         | Phylum          | 0.978                                              | 0.173                                            | 0.322                                                | 0.747                                                                                     | 0.238                                                                                         |
| p_Verrucomicrobia        | Phylum          | 0.052                                              | 0.173                                            | 0.726                                                | 0.400                                                                                     | 0.488                                                                                         |
| c_Actinobacteria         | Class           | 0.359                                              | 0.463                                            | 0.557                                                | 0.477                                                                                     | 0.807                                                                                         |
| c_Bacteroidia            | Class           | 0.064                                              | 0.358                                            | 0.432                                                | 0.591                                                                                     | 1.000                                                                                         |
| <b>c_Clostridia</b>      | <b>Class</b>    | <b>0.048</b>                                       | 0.426                                            | 0.695                                                | <b>0.004</b>                                                                              | <b>0.016</b>                                                                                  |
| c_Epsilonproteobacteria  | Class           | 0.789                                              | 0.100                                            | 0.100                                                | 0.581                                                                                     | 0.151                                                                                         |
| c_Verrucomicrobiae       | Class           | 0.052                                              | 0.173                                            | 0.726                                                | 0.377                                                                                     | 0.488                                                                                         |
| o_Bacteroidales          | Order           | 0.064                                              | 0.358                                            | 0.432                                                | 0.591                                                                                     | 1.000                                                                                         |
| o_Campylobacterales      | Order           | 0.789                                              | 0.100                                            | 0.100                                                | 0.581                                                                                     | 0.151                                                                                         |
| <b>o_Clostridiales</b>   | <b>Order</b>    | <b>0.048</b>                                       | 0.426                                            | 0.695                                                | <b>0.004</b>                                                                              | <b>0.016</b>                                                                                  |
| o_Turicibacterales       | Order           | 0.181                                              | 1.000                                            | 1.000                                                | 0.765                                                                                     | 0.968                                                                                         |
| <b>f_Bacillaceae</b>     | <b>Family</b>   | n.a.                                               | 0.441                                            | 0.181                                                | <b>0.001</b>                                                                              | <b>0.031</b>                                                                                  |
| f_Bacteroidaceae         | Family          | 0.107                                              | 0.326                                            | 0.557                                                | 0.715                                                                                     | 0.567                                                                                         |
| f_Christensenellaceae    | Family          | 0.683                                              | 0.760                                            | 0.363                                                | 0.877                                                                                     | 0.933                                                                                         |
| f_Clostridiaceae         | Family          | 0.303                                              | 0.173                                            | 0.770                                                | 0.652                                                                                     | 0.367                                                                                         |
| <b>f_Enterococcaceae</b> | <b>Family</b>   | 0.590                                              | 0.726                                            | <b>0.006</b>                                         | 0.099                                                                                     | <b>0.002</b>                                                                                  |
| f_Erysipelotrichaceae    | Family          | 0.421                                              | 0.670                                            | 0.275                                                | 0.102                                                                                     | 0.935                                                                                         |
| f_Eubacteriaceae         | Family          | 0.363                                              | 0.624                                            | 0.529                                                | 0.697                                                                                     | 0.106                                                                                         |
| f_Lachnospiraceae        | Family          | 0.083                                              | 0.903                                            | 0.232                                                | 0.847                                                                                     | 0.115                                                                                         |
| f_Peptococcaceae         | Family          | 0.407                                              | 0.208                                            | 0.295                                                | 0.763                                                                                     | 0.667                                                                                         |
| f_Peptostreptococcaceae  | Family          | 1.000                                              | 0.952                                            | 0.770                                                | 0.217                                                                                     | 0.683                                                                                         |
| f_Porphyrimonadaceae     | Family          | 0.706                                              | 0.426                                            | 0.813                                                | 0.290                                                                                     | 0.292                                                                                         |
| f_Prevotellaceae         | Family          | 0.890                                              | 0.402                                            | 0.695                                                | 0.451                                                                                     | 0.765                                                                                         |
| f_Ruminococcaceae        | Family          | 0.639                                              | 0.358                                            | 0.375                                                | 0.780                                                                                     | 0.935                                                                                         |
| f_Turicibacteraceae      | Family          | 0.181                                              | 1.000                                            | 1.000                                                | 0.765                                                                                     | 0.968                                                                                         |
| f_Veillonellaceae        | Family          | 0.208                                              | 0.241                                            | 0.193                                                | 0.715                                                                                     | 0.062                                                                                         |
| g_Akkermansia            | Genus           | 0.052                                              | 0.173                                            | 0.726                                                | 0.377                                                                                     | 0.488                                                                                         |
| g_Bacteroides            | Genus           | 0.107                                              | 0.326                                            | 0.557                                                | 0.715                                                                                     | 0.567                                                                                         |
| g_Bifidobacterium        | Genus           | 0.346                                              | 0.367                                            | 0.080                                                | 0.879                                                                                     | 0.255                                                                                         |
| g_Blautia                | Genus           | 0.934                                              | 0.670                                            | 0.160                                                | 0.505                                                                                     | 0.643                                                                                         |
| g_Catenibacterium        | Genus           | 0.363                                              | 0.201                                            | 0.423                                                | 0.150                                                                                     | 0.329                                                                                         |
| <b>g_Clostridium</b>     | <b>Genus</b>    | 0.151                                              | <b>0.009</b>                                     | 0.322                                                | 0.561                                                                                     | 0.723                                                                                         |
| g_Coprobacillus          | Genus           | 0.272                                              | 0.838                                            | 0.554                                                | 0.129                                                                                     | 0.339                                                                                         |
| g_Coprococcus            | Genus           | 0.804                                              | 0.426                                            | 0.105                                                | 0.400                                                                                     | 0.892                                                                                         |
| g_Dialister              | Genus           | 0.727                                              | 0.327                                            | 0.108                                                | 0.132                                                                                     | 0.358                                                                                         |
| <b>g_Enterococcus</b>    | <b>Genus</b>    | 0.590                                              | 0.726                                            | <b>0.010</b>                                         | 0.099                                                                                     | <b>0.002</b>                                                                                  |
| g_Erwinia                | Genus           | 0.722                                              | 0.120                                            | 0.933                                                | 0.163                                                                                     | 0.268                                                                                         |
| g_[Eubacterium]          | Genus           | 0.616                                              | 0.184                                            | 0.322                                                | 0.295                                                                                     | 0.196                                                                                         |
| g_Faecalibacterium       | Genus           | 0.847                                              | 0.485                                            | 0.232                                                | 0.234                                                                                     | 1.000                                                                                         |
| g_Haemophilus            | Genus           | 0.255                                              | 0.359                                            | 1.000                                                | 0.947                                                                                     | 0.801                                                                                         |
| g_Lachnospira            | Genus           | 0.083                                              | 0.364                                            | 0.846                                                | 0.715                                                                                     | 0.892                                                                                         |
| <b>g_Oribacterium</b>    | <b>Genus</b>    | 0.855                                              | n.a.                                             | 0.181                                                | <b>0.045</b>                                                                              | 0.779                                                                                         |
| g_Parabacteroides        | Genus           | 0.706                                              | 0.426                                            | 0.813                                                | 0.290                                                                                     | 0.292                                                                                         |
| g_Paraprevotella         | Genus           | 0.441                                              | 0.447                                            | 0.675                                                | 0.578                                                                                     | 0.310                                                                                         |
| g_Prevotella             | Genus           | 0.890                                              | 0.402                                            | 0.695                                                | 0.451                                                                                     | 0.765                                                                                         |
| g_Proteus                | Genus           | 0.371                                              | n.a.                                             | n.a.                                                 | 0.180                                                                                     | 0.263                                                                                         |
| g_Pseudobutyrvibrio      | Genus           | 1.000                                              | n.a.                                             | n.a.                                                 | 0.370                                                                                     | 0.462                                                                                         |
| g_Ruminococcus           | Genus           | 0.950                                              | 0.903                                            | 0.846                                                | 0.451                                                                                     | 0.397                                                                                         |
| g_Turicibacter           | Genus           | 0.181                                              | 1.000                                            | 1.000                                                | 0.765                                                                                     | 0.968                                                                                         |
| g_Veillonella            | Genus           | 0.060                                              | 0.224                                            | 0.193                                                | 0.585                                                                                     | 0.076                                                                                         |

## TNFi pre

| Treatment phase | Node ID | Taxon                 | Taxonomic rank |
|-----------------|---------|-----------------------|----------------|
| TNFi pre        | 1       | [Barnesiellaceae]     | family         |
| TNFi pre        | 2       | [Eubacterium]         | genus          |
| TNFi pre        | 3       | [Paraprevotellaceae]  | family         |
| TNFi pre        | 4       | [Prevotella]          | genus          |
| TNFi pre        | 5       | [Ruminococcus]        | genus          |
| TNFi pre        | 6       | Akkermansia           | genus          |
| TNFi pre        | 7       | Bifidobacterium       | genus          |
| TNFi pre        | 8       | Catenibacterium       | genus          |
| TNFi pre        | 9       | Christensenellaceae   | family         |
| TNFi pre        | 10      | Clostridiaceae        | family         |
| TNFi pre        | 11      | Clostridium           | genus          |
| TNFi pre        | 12      | Collinsella           | genus          |
| TNFi pre        | 13      | Coriobacteriaceae     | family         |
| TNFi pre        | 14      | Desulfovibrio         | genus          |
| TNFi pre        | 15      | Dialister             | genus          |
| TNFi pre        | 16      | Dorea                 | genus          |
| TNFi pre        | 17      | Enterobacteriaceae    | family         |
| TNFi pre        | 18      | Erysipelotrichaceae   | family         |
| TNFi pre        | 19      | Fusobacterium         | genus          |
| TNFi pre        | 20      | Haemophilus           | genus          |
| TNFi pre        | 21      | Lachnospira           | genus          |
| TNFi pre        | 22      | Methanobrevibacter    | genus          |
| TNFi pre        | 23      | Oscillospira          | genus          |
| TNFi pre        | 24      | Pasteurellaceae       | family         |
| TNFi pre        | 25      | Peptostreptococcaceae | family         |
| TNFi pre        | 26      | Phascolarctobacterium | genus          |
| TNFi pre        | 27      | Prevotella            | genus          |
| TNFi pre        | 28      | RF39                  | order          |
| TNFi pre        | 29      | Roseburia             | genus          |
| TNFi pre        | 30      | Ruminococcus          | genus          |
| TNFi pre        | 31      | S24-7                 | family         |
| TNFi pre        | 32      | SMB53                 | genus          |
| TNFi pre        | 33      | Streptococcus         | genus          |
| TNFi pre        | 32      | Sutterella            | genus          |
| TNFi pre        | 35      | Veillonella           | genus          |

## TNFi maintenance

| Treatment phase  | Node ID | Taxon                 | Taxonomic rank |
|------------------|---------|-----------------------|----------------|
| TNFi maintenance | 1       | [Barnesiellaceae]     | family         |
| TNFi maintenance | 2       | [Eubacterium]         | genus          |
| TNFi maintenance | 3       | [Paraprevotellaceae]  | family         |
| TNFi maintenance | 4       | [Prevotella]          | genus          |
| TNFi maintenance | 5       | [Ruminococcus]        | genus          |
| TNFi maintenance | 6       | Akkermansia           | genus          |
| TNFi maintenance | 7       | Bifidobacterium       | genus          |
| TNFi maintenance | 8       | Catenibacterium       | genus          |
| TNFi maintenance | 9       | Christensenellaceae   | family         |
| TNFi maintenance | 10      | Clostridiaceae        | family         |
| TNFi maintenance | 11      | Clostridium           | genus          |
| TNFi maintenance | 12      | Collinsella           | genus          |
| TNFi maintenance | 13      | Coriobacteriaceae     | family         |
| TNFi maintenance | 14      | Desulfovibrio         | genus          |
| TNFi maintenance | 15      | Dorea                 | genus          |
| TNFi maintenance | 16      | Enterobacteriaceae    | family         |
| TNFi maintenance | 17      | Erysipelotrichaceae   | family         |
| TNFi maintenance | 18      | Fusobacterium         | genus          |
| TNFi maintenance | 19      | Haemophilus           | genus          |
| TNFi maintenance | 20      | Lachnospira           | genus          |
| TNFi maintenance | 21      | Methanobrevibacter    | genus          |
| TNFi maintenance | 22      | Oscillospira          | genus          |
| TNFi maintenance | 23      | Paraprevotella        | genus          |
| TNFi maintenance | 24      | Pasteurellaceae       | family         |
| TNFi maintenance | 25      | Peptostreptococcaceae | family         |
| TNFi maintenance | 26      | Phascolarctobacterium | genus          |
| TNFi maintenance | 27      | Prevotella            | genus          |
| TNFi maintenance | 28      | RF39                  | order          |
| TNFi maintenance | 29      | Roseburia             | genus          |
| TNFi maintenance | 30      | Ruminococcus          | genus          |
| TNFi maintenance | 31      | S24-7                 | family         |
| TNFi maintenance | 32      | SMB53                 | genus          |
| TNFi maintenance | 33      | Streptococcus         | genus          |
| TNFi maintenance | 34      | Sutterella            | genus          |
| TNFi maintenance | 35      | Veillonella           | genus          |

## IL-17i pre

| Treatment phase | Node ID | Taxon                 | Taxonomic rank |
|-----------------|---------|-----------------------|----------------|
| IL-17i pre      | 1       | [Barnesiellaceae]     | family         |
| IL-17i pre      | 2       | [Eubacterium]         | genus          |
| IL-17i pre      | 3       | [Prevotella]          | genus          |
| IL-17i pre      | 4       | [Ruminococcus]        | genus          |
| IL-17i pre      | 5       | Akkermansia           | genus          |
| IL-17i pre      | 6       | Bifidobacterium       | genus          |
| IL-17i pre      | 7       | Bilophila             | genus          |
| IL-17i pre      | 8       | Butyricimonas         | genus          |
| IL-17i pre      | 9       | Catenibacterium       | genus          |
| IL-17i pre      | 10      | Christensenellaceae   | family         |
| IL-17i pre      | 11      | Clostridiaceae        | family         |
| IL-17i pre      | 12      | Clostridium           | genus          |
| IL-17i pre      | 13      | Collinsella           | genus          |
| IL-17i pre      | 14      | Coriobacteriaceae     | family         |
| IL-17i pre      | 15      | Dialister             | genus          |
| IL-17i pre      | 16      | Dorea                 | genus          |
| IL-17i pre      | 17      | Enterobacteriaceae    | family         |
| IL-17i pre      | 18      | Erwinia               | genus          |
| IL-17i pre      | 19      | Erysipelotrichaceae   | family         |
| IL-17i pre      | 20      | Haemophilus           | genus          |
| IL-17i pre      | 21      | Lachnobacterium       | genus          |
| IL-17i pre      | 22      | Lachnospira           | genus          |
| IL-17i pre      | 23      | Lactobacillus         | genus          |
| IL-17i pre      | 24      | Oscillospira          | genus          |
| IL-17i pre      | 25      | Paraprevotella        | genus          |
| IL-17i pre      | 26      | Peptostreptococcaceae | family         |
| IL-17i pre      | 27      | Phascolarctobacterium | genus          |
| IL-17i pre      | 28      | Prevotella            | genus          |
| IL-17i pre      | 29      | RF32                  | order          |
| IL-17i pre      | 30      | RF39                  | order          |
| IL-17i pre      | 31      | Roseburia             | genus          |
| IL-17i pre      | 32      | Ruminococcus          | genus          |
| IL-17i pre      | 33      | SMB53                 | genus          |
| IL-17i pre      | 32      | Streptococcus         | genus          |
| IL-17i pre      | 35      | Succinivibrio         | genus          |
| IL-17i pre      | 36      | Sutterella            | genus          |
| IL-17i pre      | 37      | Veillonella           | genus          |

## IL-17i maintenance

| Treatment phase    | Node ID | Taxon                 | Taxonomic rank |
|--------------------|---------|-----------------------|----------------|
| IL-17i maintenance | 1       | [Barnesiellaceae]     | family         |
| IL-17i maintenance | 2       | [Prevotella]          | genus          |
| IL-17i maintenance | 3       | [Ruminococcus]        | genus          |
| IL-17i maintenance | 4       | Catenibacterium       | genus          |
| IL-17i maintenance | 5       | Christensenellaceae   | family         |
| IL-17i maintenance | 6       | Clostridiaceae        | family         |
| IL-17i maintenance | 7       | Clostridium           | genus          |
| IL-17i maintenance | 8       | Collinsella           | genus          |
| IL-17i maintenance | 9       | Coriobacteriaceae     | family         |
| IL-17i maintenance | 10      | Dialister             | genus          |
| IL-17i maintenance | 11      | Dorea                 | genus          |
| IL-17i maintenance | 12      | Enterobacteriaceae    | family         |
| IL-17i maintenance | 13      | Erwinia               | genus          |
| IL-17i maintenance | 14      | Erysipelotrichaceae   | family         |
| IL-17i maintenance | 15      | Haemophilus           | genus          |
| IL-17i maintenance | 16      | Lachnobacterium       | genus          |
| IL-17i maintenance | 17      | Lachnospira           | genus          |
| IL-17i maintenance | 18      | Lactobacillus         | genus          |
| IL-17i maintenance | 19      | Oscillospira          | genus          |
| IL-17i maintenance | 20      | Paraprevotella        | genus          |
| IL-17i maintenance | 21      | Peptostreptococcaceae | family         |
| IL-17i maintenance | 22      | Phascolarctobacterium | genus          |
| IL-17i maintenance | 23      | Prevotella            | genus          |
| IL-17i maintenance | 24      | RF39                  | order          |
| IL-17i maintenance | 25      | Roseburia             | genus          |
| IL-17i maintenance | 26      | Ruminococcus          | genus          |
| IL-17i maintenance | 27      | SMB53                 | genus          |
| IL-17i maintenance | 28      | Streptococcus         | genus          |
| IL-17i maintenance | 29      | Succinivibrio         | genus          |
| IL-17i maintenance | 30      | Sutterella            | genus          |
| IL-17i maintenance | 31      | Veillonella           | genus          |

| Taxa                              | Taxonomic level | p-value relative abundance TNFi pre vs maintenance | p-value relative abundance IL-17i pre vs loading | p-value relative abundance IL-17i pre vs maintenance | p-value magnitude of relative abundance change TNFi pre-maintenance vs IL-17i pre-loading | p-value magnitude of relative abundance change TNFi pre-maintenance vs IL-17i pre-maintenance |
|-----------------------------------|-----------------|----------------------------------------------------|--------------------------------------------------|------------------------------------------------------|-------------------------------------------------------------------------------------------|-----------------------------------------------------------------------------------------------|
| p_Ascomycota                      | Phylum          | 0.847                                              | 0.670                                            | 0.232                                                | 0.747                                                                                     | 0.807                                                                                         |
| c_Saccharomycetes                 | Class           | 0.135                                              | 0.173                                            | 0.084                                                | 0.172                                                                                     | 0.196                                                                                         |
| <b>c_Tremellomycetes</b>          | <b>Class</b>    | 0.423                                              | 0.059                                            | 0.673                                                | 0.455                                                                                     | <b>0.031</b>                                                                                  |
| o_Saccharomycetales               | Order           | 0.135                                              | 0.173                                            | 0.084                                                | 0.172                                                                                     | 0.196                                                                                         |
| <b>o_Tremellales</b>              | <b>Order</b>    | n.a.                                               | 0.181                                            | 0.181                                                | 0.069                                                                                     | <b>0.031</b>                                                                                  |
| f_Glomerellaceae                  | Family          | 0.371                                              | n.a.                                             | n.a.                                                 | 0.180                                                                                     | 0.263                                                                                         |
| f_Incertae sedis                  | Family          | 0.720                                              | 0.808                                            | 0.160                                                | 0.400                                                                                     | 0.338                                                                                         |
| f_Mucoraceae                      | Family          | 0.371                                              | 0.371                                            | 0.100                                                | 0.971                                                                                     | 0.251                                                                                         |
| f_Mycosphaerellaceae              | Family          | 0.802                                              | 0.919                                            | 0.675                                                | 0.913                                                                                     | 0.358                                                                                         |
| f_Plectosphaerellaceae            | Family          | 0.371                                              | 1.000                                            | 1.000                                                | 0.563                                                                                     | 0.922                                                                                         |
| f_Saccharomycetaceae              | Family          | 0.303                                              | 0.358                                            | 0.275                                                | 0.683                                                                                     | 0.338                                                                                         |
| f_Sclerotiniaceae                 | Family          | 0.371                                              | n.a.                                             | n.a.                                                 | 0.180                                                                                     | 0.263                                                                                         |
| g_AspERGILLUS                     | Genus           | 0.188                                              | 0.058                                            | 0.375                                                | 0.290                                                                                     | 0.196                                                                                         |
| g_Candida                         | Genus           | 0.720                                              | 0.808                                            | 0.160                                                | 0.400                                                                                     | 0.338                                                                                         |
| g_DeBaryomyces                    | Genus           | 0.092                                              | 0.845                                            | 0.183                                                | 0.555                                                                                     | 0.597                                                                                         |
| g_Glomerella                      | Genus           | 0.371                                              | n.a.                                             | n.a.                                                 | 0.180                                                                                     | 0.263                                                                                         |
| g_Penicillium                     | Genus           | 0.754                                              | 0.391                                            | 0.084                                                | 0.561                                                                                     | 0.196                                                                                         |
| g_Plectosphaerella                | Genus           | 1.000                                              | 1.000                                            | 1.000                                                | 1.000                                                                                     | 0.768                                                                                         |
| <b>g_Saccharomyces</b>            | <b>Genus</b>    | 0.421                                              | 0.903                                            | 0.846                                                | 0.451                                                                                     | <b>0.041</b>                                                                                  |
| <b>s_AspERGILLUS niger</b>        | <b>Species</b>  | 0.255                                              | <b>0.021</b>                                     | 0.432                                                | 0.646                                                                                     | 0.890                                                                                         |
| <b>s_Candida albicans</b>         | <b>Species</b>  | 0.169                                              | 0.426                                            | 0.492                                                | 0.270                                                                                     | <b>0.041</b>                                                                                  |
| s_Candida dubliniensis            | Species         | 0.590                                              | 0.584                                            | 1.000                                                | 0.811                                                                                     | 0.973                                                                                         |
| <b>s_Candida fermenticarens</b>   | <b>Species</b>  | 0.208                                              | n.a.                                             | n.a.                                                 | <b>0.011</b>                                                                              | <b>0.029</b>                                                                                  |
| s_Candida parapsilosis            | Species         | 1.000                                              | 0.505                                            | 0.106                                                | 0.930                                                                                     | 0.456                                                                                         |
| <b>s_Candida tropicalis</b>       | <b>Species</b>  | 0.576                                              | 0.363                                            | 0.106                                                | 0.165                                                                                     | <b>0.023</b>                                                                                  |
| s_Fusarium sp 4 TMS 2011          | Species         | 0.371                                              | 1.000                                            | n.a.                                                 | 0.563                                                                                     | 0.263                                                                                         |
| s_Hypocrea pseudokoningii         | Species         | 0.181                                              | n.a.                                             | n.a.                                                 | 0.091                                                                                     | 0.154                                                                                         |
| s_Penicillium charlesii           | Species         | 0.371                                              | 1.000                                            | n.a.                                                 | 0.563                                                                                     | 0.263                                                                                         |
| s_Pichia sp 1 TMS 2011            | Species         | 0.371                                              | 1.000                                            | 1.000                                                | 0.856                                                                                     | 0.696                                                                                         |
| <b>s_Rhodotorula sp RhSoW01</b>   | <b>Species</b>  | 0.584                                              | n.a.                                             | 0.059                                                | <b>0.045</b>                                                                              | 0.333                                                                                         |
| <b>s_Saccharomyces cerevisiae</b> | <b>Species</b>  | 0.421                                              | 0.903                                            | 0.846                                                | 0.451                                                                                     | <b>0.041</b>                                                                                  |
| s_Trichoderma longibrachiatum     | Species         | 0.181                                              | n.a.                                             | n.a.                                                 | 0.091                                                                                     | 0.154                                                                                         |

# :: Supplementary Table 5 ::

| Pathway                                                                                                                    | Mean pre  | Mean maintenance | Kruskal-Wallis p-value | Wilcoxon p-value |
|----------------------------------------------------------------------------------------------------------------------------|-----------|------------------|------------------------|------------------|
| PWY-6121: 5-aminoimidazole ribonucleotide biosynthesis I   Streptococcus (g); Streptococcus salivarius (s)                 | 1.290E-06 | 0.000E+00        | <b>0.017</b>           | 0.059            |
| PWY0-166: superpathway of pyrimidine deoxyribonucleotides de novo biosynthesis (E. coli)                                   | 1.820E-04 | 1.263E-04        | <b>0.017</b>           | <b>0.008</b>     |
| PWY-7184: pyrimidine deoxyribonucleotides de novo biosynthesis I                                                           | 1.508E-04 | 1.007E-04        | <b>0.026</b>           | <b>0.003</b>     |
| 1CMET2-PWY: N10-formyl-tetrahydrofolate biosynthesis   Bacteroides (g); Bacteroides xylanisolvens (s)                      | 4.380E-06 | 6.880E-07        | <b>0.029</b>           | <b>0.009</b>     |
| FUCCAT-PWY: fucose degradation                                                                                             | 1.310E-05 | 3.600E-05        | <b>0.033</b>           | <b>0.005</b>     |
| PWY-7197: pyrimidine deoxyribonucleotide phosphorylation                                                                   | 1.146E-04 | 7.600E-05        | <b>0.033</b>           | <b>0.007</b>     |
| PWY-7221: guanosine ribonucleotides de novo biosynthesis   Bacteroides (g); Bacteroides xylanisolvens (s)                  | 6.780E-06 | 1.220E-06        | <b>0.034</b>           | <b>0.014</b>     |
| PWY-7111: pyruvate fermentation to isobutanol (engineered)   Clostridium (g); Clostridium nexile (s)                       | 0.000E+00 | 3.060E-06        | <b>0.035</b>           | 0.100            |
| PWY0-1296: purine ribonucleosides degradation   Clostridium (g); Clostridium nexile (s)                                    | 0.000E+00 | 3.720E-06        | <b>0.035</b>           | 0.100            |
| UNINTEGRATED   Clostridium (g); Clostridium nexile (s)                                                                     | 0.000E+00 | 3.822E-03        | <b>0.035</b>           | 0.100            |
| VALSYN-PWY: L-valine biosynthesis   Clostridium (g); Clostridium nexile (s)                                                | 0.000E+00 | 2.830E-06        | <b>0.035</b>           | 0.100            |
| GLYCOGENSYNTH-PWY: glycogen biosynthesis I (from ADP-D-Glucose)                                                            | 1.194E-04 | 1.717E-04        | <b>0.036</b>           | 0.083            |
| PPGPPMET-PWY: ppGpp biosynthesis   unclassified                                                                            | 3.250E-06 | 9.510E-07        | <b>0.041</b>           | <b>0.009</b>     |
| PWY-7282: 4-amino-2-methyl-5-phosphomethylpyrimidine biosynthesis (yeast)   Bacteroides (g); Bacteroides xylanisolvens (s) | 4.640E-06 | 8.820E-07        | <b>0.047</b>           | 0.058            |
| PWY0-845: superpathway of pyridoxal 5'-phosphate biosynthesis and salvage   Bacteroides (g); Bacteroides xylanisolvens (s) | 4.700E-06 | 7.250E-07        | <b>0.047</b>           | <b>0.044</b>     |

| <b>Pathway</b>                                                                                                                                | <b>Mean pre</b> | <b>Mean loading</b> | <b>Mean maintenance</b> | <b>Kruskal-Wallis p-value</b> | <b>Wilcoxon pre-loading p-value</b> | <b>Wilcoxon pre-maintenance p-value</b> |
|-----------------------------------------------------------------------------------------------------------------------------------------------|-----------------|---------------------|-------------------------|-------------------------------|-------------------------------------|-----------------------------------------|
| PWY-6595: superpathway of guanosine nucleotides degradation (plants)                                                                          | 7.260E-06       | 1.010E-05           | 2.750E-06               | <b>0.012</b>                  | 0.153                               | <b>0.037</b>                            |
| TRPSYN-PWY: L-tryptophan biosynthesis   unclassified                                                                                          | 7.040E-06       | 1.820E-05           | 7.690E-06               | <b>0.015</b>                  | <b>0.005</b>                        | 0.286                                   |
| PWY-621: sucrose degradation III (sucrose invertase)   unclassified                                                                           | 7.900E-06       | 1.310E-05           | 1.950E-06               | <b>0.017</b>                  | 0.078                               | <b>0.030</b>                            |
| DTDPRHAMSYN-PWY: dTDP-L-rhamnose biosynthesis I Eggerthella (g); Eggerthella lenta (s)                                                        | 0.000E+00       | 4.270E-07           | 0.000E+00               | <b>0.024</b>                  | 0.100                               | NaN                                     |
| PWY-6263: superpathway of menaquinol-8 biosynthesis II                                                                                        | 0.000E+00       | 1.040E-06           | 1.160E-07               | <b>0.029</b>                  | 0.059                               | 1                                       |
| PWY-6386: UDP-N-acetylmuramoyl-pentapeptide biosynthesis II (lysine-containing)   Flavonifractor (g); Flavonifractor plautii (s)              | 6.830E-07       | 5.900E-08           | 0.000E+00               | <b>0.031</b>                  | 0.059                               | 0.100                                   |
| PWY-6387: UDP-N-acetylmuramoyl-pentapeptide biosynthesis I (meso-diaminopimelate containing)   Flavonifractor (g); Flavonifractor plautii (s) | 6.140E-07       | 5.550E-08           | 0.000E+00               | <b>0.035</b>                  | 0.178                               | 0.100                                   |
| COBALSYN-PWY: adenosylcobalamin salvage from cobinamide   unclassified                                                                        | 2.870E-06       | 4.080E-06           | 0.000E+00               | <b>0.039</b>                  | 0.286                               | 0.059                                   |

**:: Supplementary Table 7 ::**

| <b>Cytokine or protein</b> | <b>Specimen</b> | <b>Wilcoxon TNFi pre-maintenance p-value</b> | <b>Wilcoxon IL-17i pre-loading p-value</b> | <b>Wilcoxon IL-17i pre-maintenance p-value</b> |
|----------------------------|-----------------|----------------------------------------------|--------------------------------------------|------------------------------------------------|
| <b>Calprotectin</b>        | fecal           | 0.847                                        | 0.685                                      | 0.820                                          |
| <b>CCL20</b>               | fecal           | 0.447                                        | 0.208                                      | 0.418                                          |
| <b>S100</b>                | fecal           | 0.706                                        | 0.784                                      | 0.250                                          |
| <b>slgA</b>                | fecal           | 0.389                                        | 0.685                                      | 0.734                                          |
| <b>IL-12p70</b>            | fecal           | 0.208                                        | 0.305                                      | 0.496                                          |
| <b>IL-23</b>               | fecal           | 0.364                                        | 0.965                                      | 0.675                                          |
| <b>IL-21</b>               | fecal           | 0.490                                        | 0.100                                      | 0.944                                          |
| <b>IL-17A</b>              | fecal           | 0.126                                        | 1.000                                      | 0.361                                          |
| <b>IL-17E (IL-25)</b>      | fecal           | 0.187                                        | 0.255                                      | 0.407                                          |
| <b>IL-17F</b>              | fecal           | 0.141                                        | 0.181                                      | 0.423                                          |
| <b>IL-33</b>               | fecal           | 0.418                                        | 1.000                                      | 1.000                                          |



| <b>Metabolite</b>              | <b>Specimen</b> | <b>Wilcoxon TNFi pre-maintenance p-value</b> | <b>Wilcoxon IL-17i pre-loading p-value</b> | <b>Wilcoxon IL-17i pre-maintenance p-value</b> |
|--------------------------------|-----------------|----------------------------------------------|--------------------------------------------|------------------------------------------------|
| <b>Acetic acid (C=2)</b>       | fecal           | 0.281                                        | 0.361                                      | 1.000                                          |
| <b>Propionic acid (C=3)</b>    | fecal           | 0.505                                        | 0.784                                      | 0.441                                          |
| <b>Butyric acid (C=4)</b>      | fecal           | 0.889                                        | 0.894                                      | 0.575                                          |
| <b>Isovaleric acid (C=5)</b>   | fecal           | n.a.                                         | 0.346                                      | n.a.                                           |
| <b>Valeric acid (C=5)</b>      | fecal           | 1.000                                        | 0.556                                      | 0.726                                          |
| <b>Hexanoic acid (C=6)</b>     | fecal           | 0.851                                        | 0.726                                      | 0.675                                          |
| <b>Heptanoic acid (C=7)</b>    | fecal           | 0.683                                        | 0.091                                      | 0.441                                          |
| <b>Octanoic acid (C=8)</b>     | fecal           | 0.379                                        | 0.402                                      | 0.232                                          |
| <b>Nonanoic acid (C=9)</b>     | fecal           | 0.135                                        | 1.000                                      | <b>0.014</b>                                   |
| <b>Decanoic acid (C=10)</b>    | fecal           | 0.890                                        | 0.808                                      | 0.846                                          |
| <b>Dodecanoic acid (C=12)</b>  | fecal           | 0.414                                        | 0.715                                      | 0.813                                          |
| <b>Myristic acid (C=14)</b>    | fecal           | 0.802                                        | 0.358                                      | 0.846                                          |
| <b>Palmitoleic acid (C=16)</b> | fecal           | 0.454                                        | 0.153                                      | 0.625                                          |
| <b>Palmitic acid (C=16)</b>    | fecal           | 0.890                                        | 0.153                                      | 0.492                                          |
| <b>Oleic acid (C=18)</b>       | fecal           | 0.720                                        | 0.358                                      | 0.846                                          |
| <b>Stearic acid (C=18)</b>     | fecal           | 0.359                                        | 0.078                                      | 0.695                                          |
| <b>Arachidic acid (C=20)</b>   | fecal           | 1.000                                        | 0.135                                      | 0.846                                          |
| <b>Nervonic acid (C=24)</b>    | fecal           | 0.754                                        | 0.670                                      | 1.000                                          |
| <b>Lignoceric acid (C=24)</b>  | fecal           | 0.572                                        | 0.670                                      | 0.922                                          |
